# Supplementary material for: Discovery of pyrano[2,3-d]pyrimidine-2,4-dione derivatives as novel PARP-1 inhibitors: design, synthesis and antitumor activity
Source: Royal Society of Chemistry journal article supplement (doi:10.1039/d0ra10321g), 2021-01-01

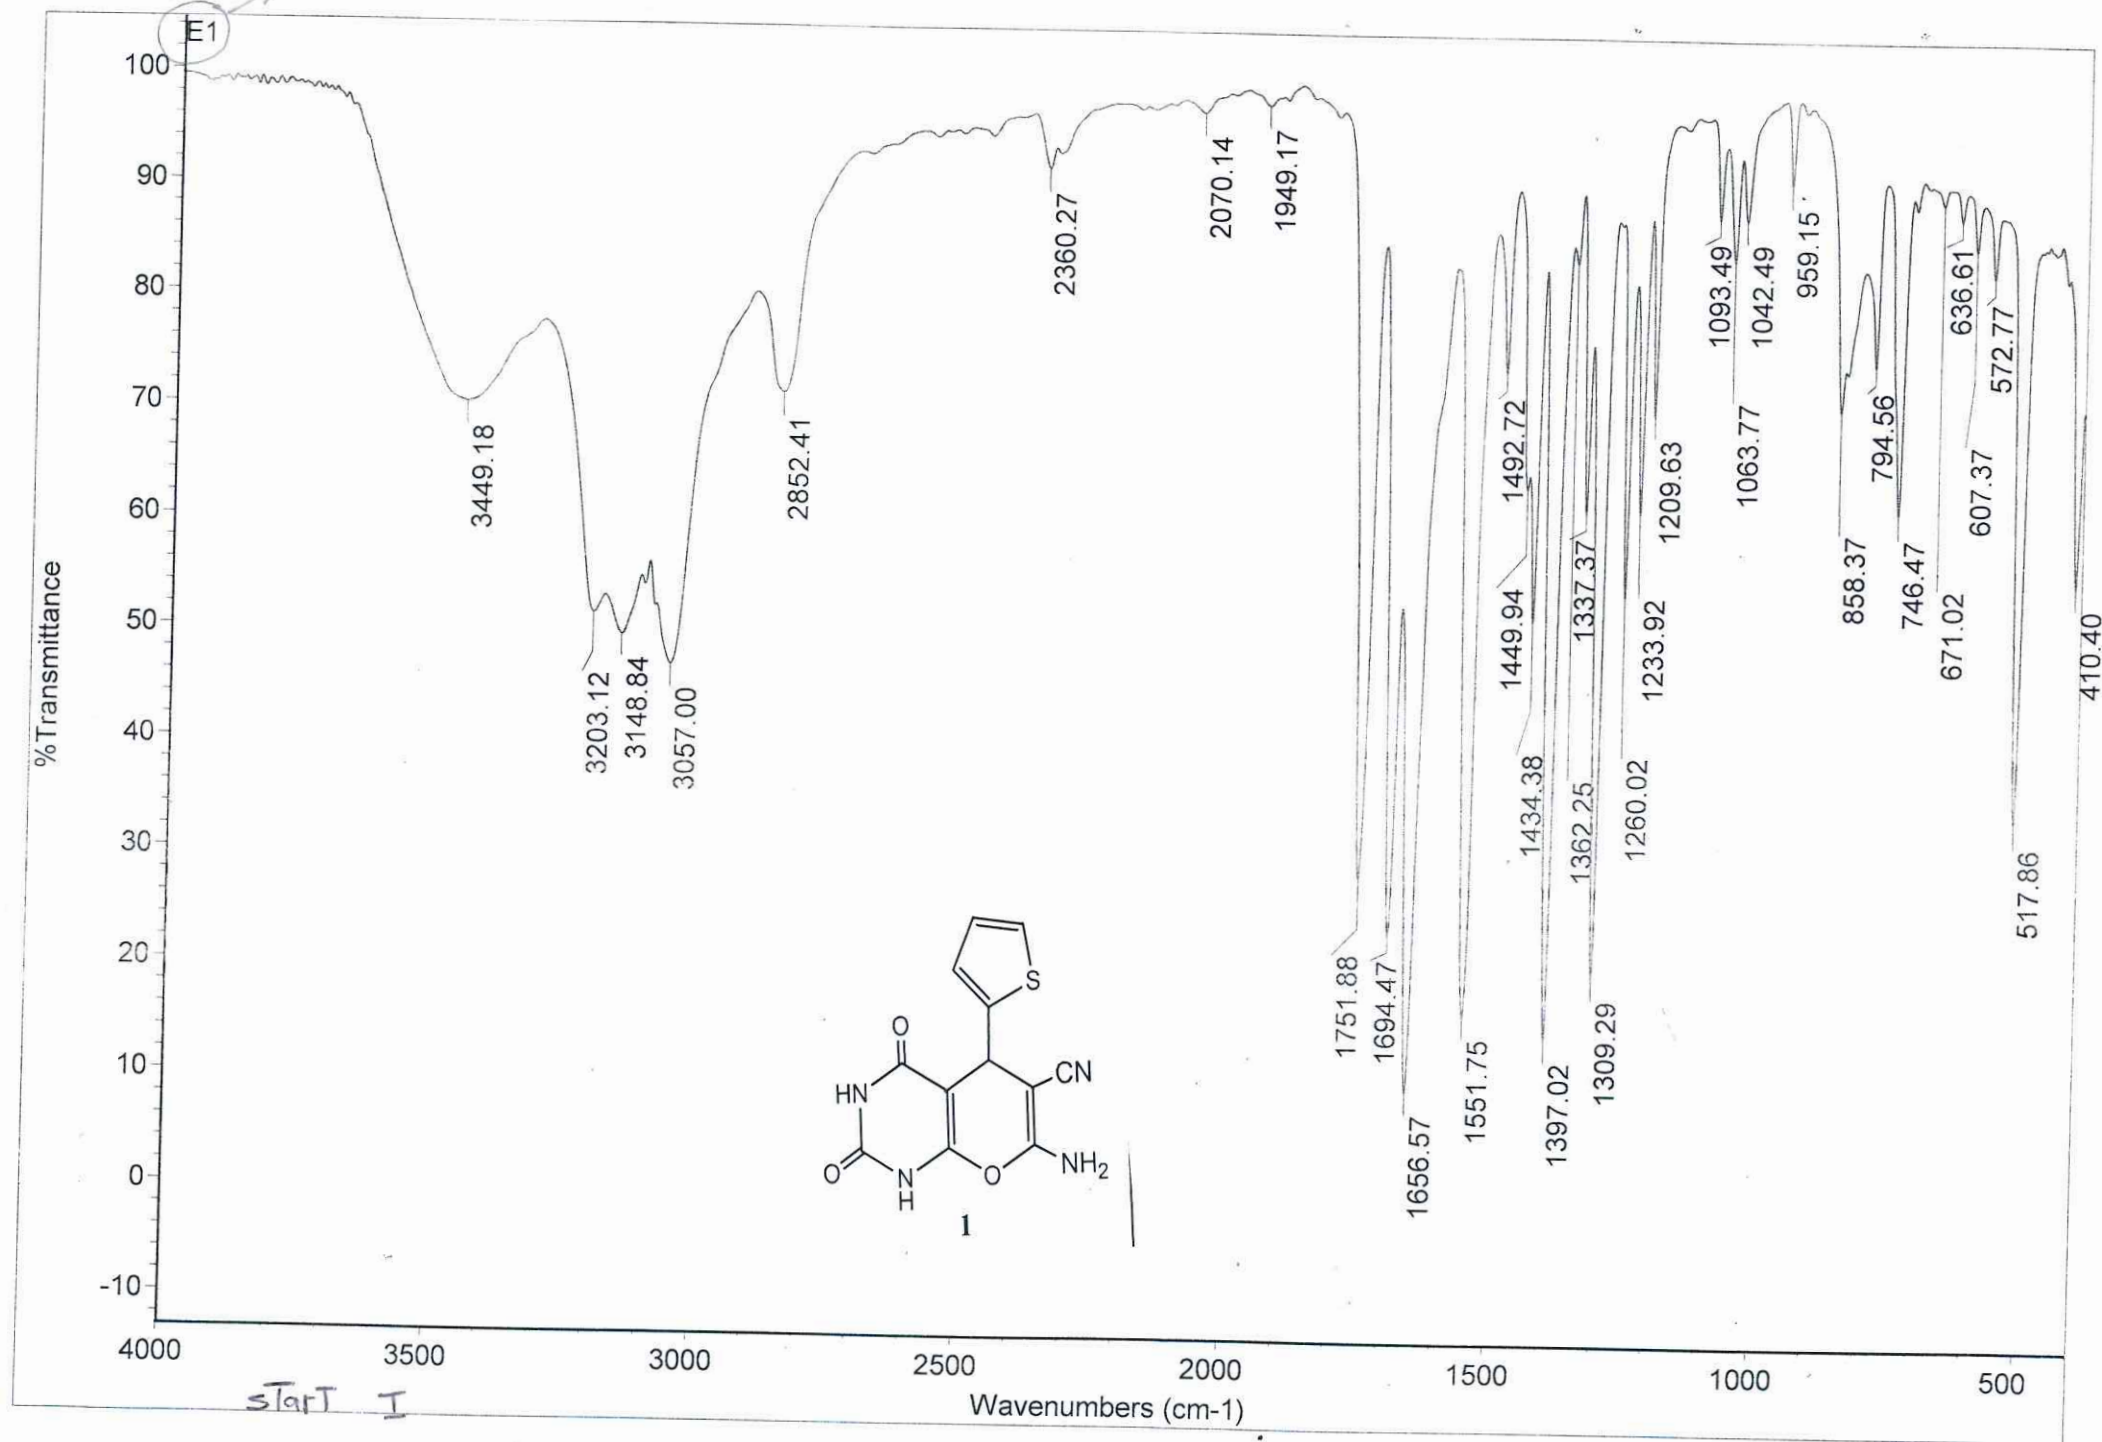

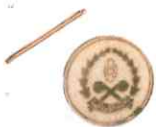

Dr\_EmanHassan-E

Dr\_EmanHassan-E

Sample Name **Dr\_EmanHassan-E**  
Date collected **2018-02-18**

Pulse sequence **PROTON**  
Solvent **DMSO**

Temperature **25**  
Spectrometer **nmr400-mercury400**

Study owner **vnmr1**  
Operator **vnmr1**

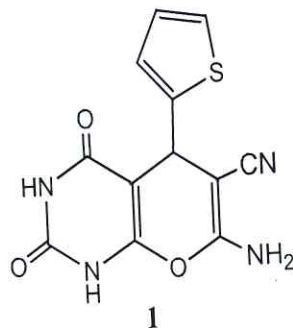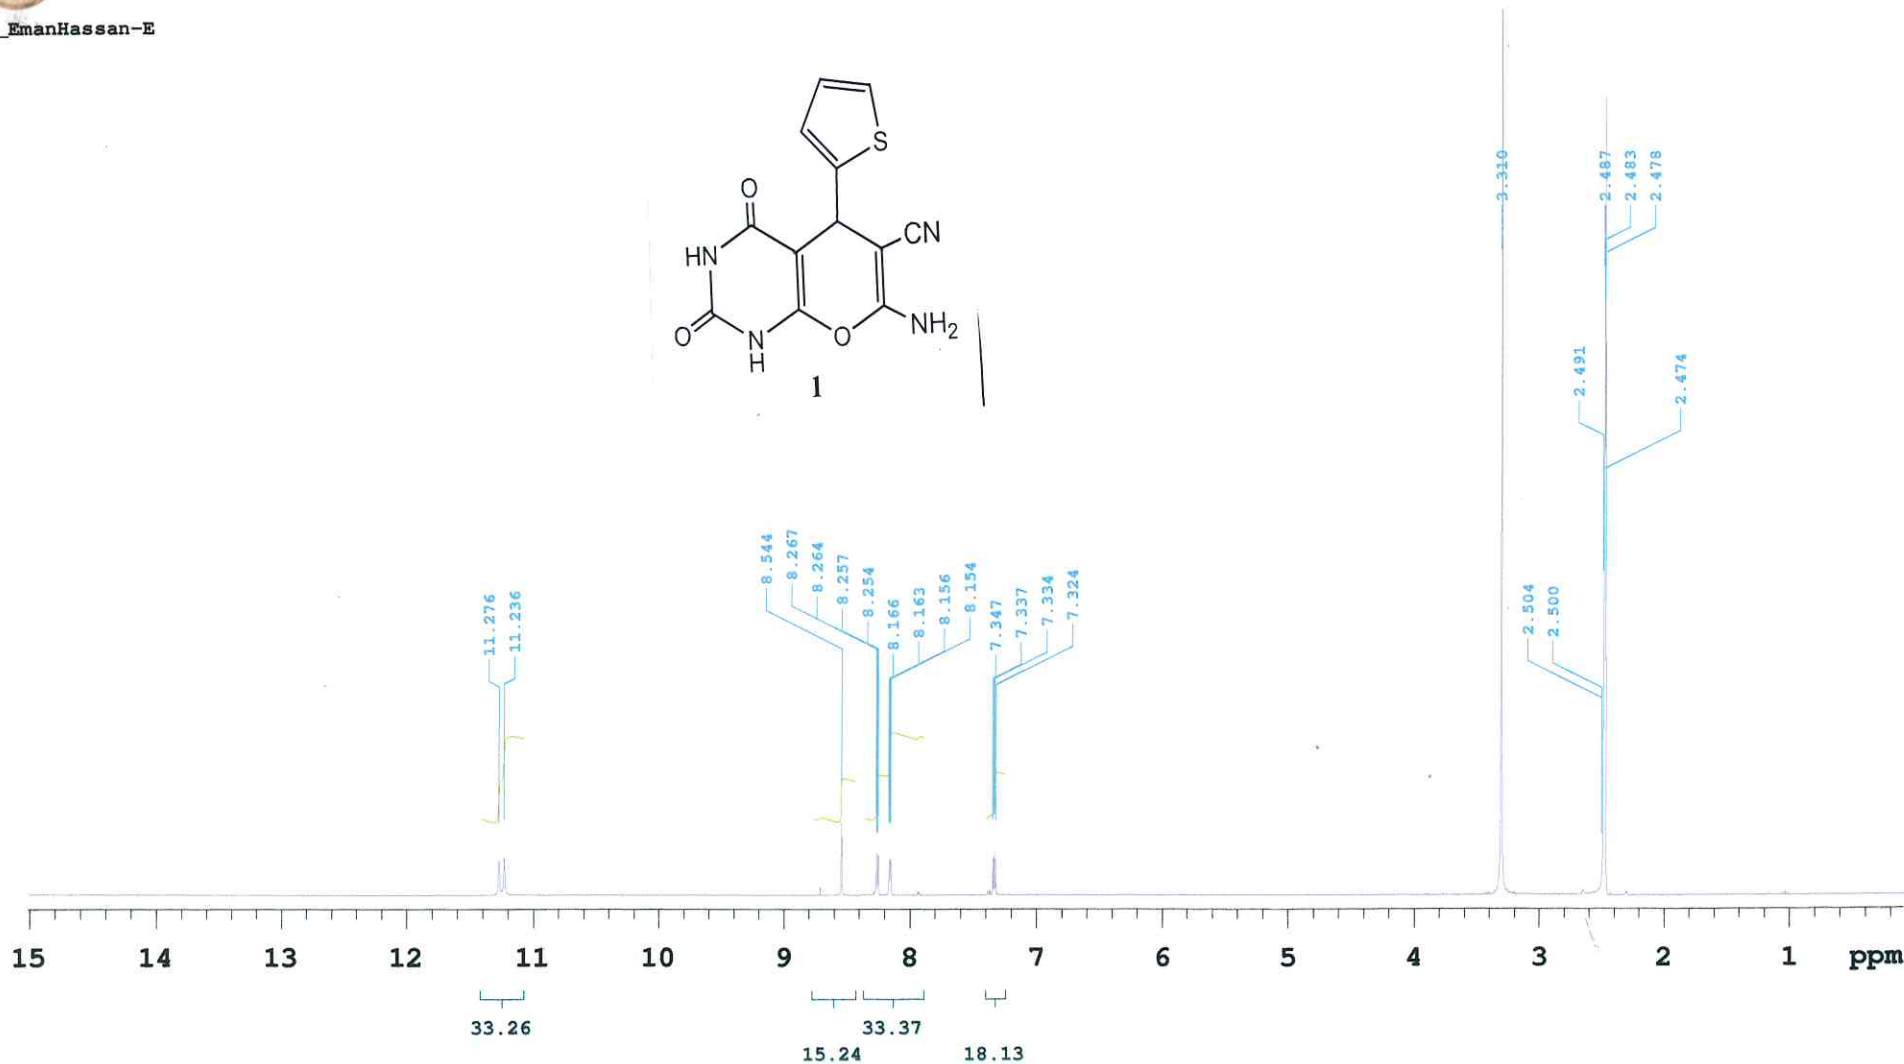

Plotname: Dr\_EmanHassan-E\_PROTON\_01\_plot02

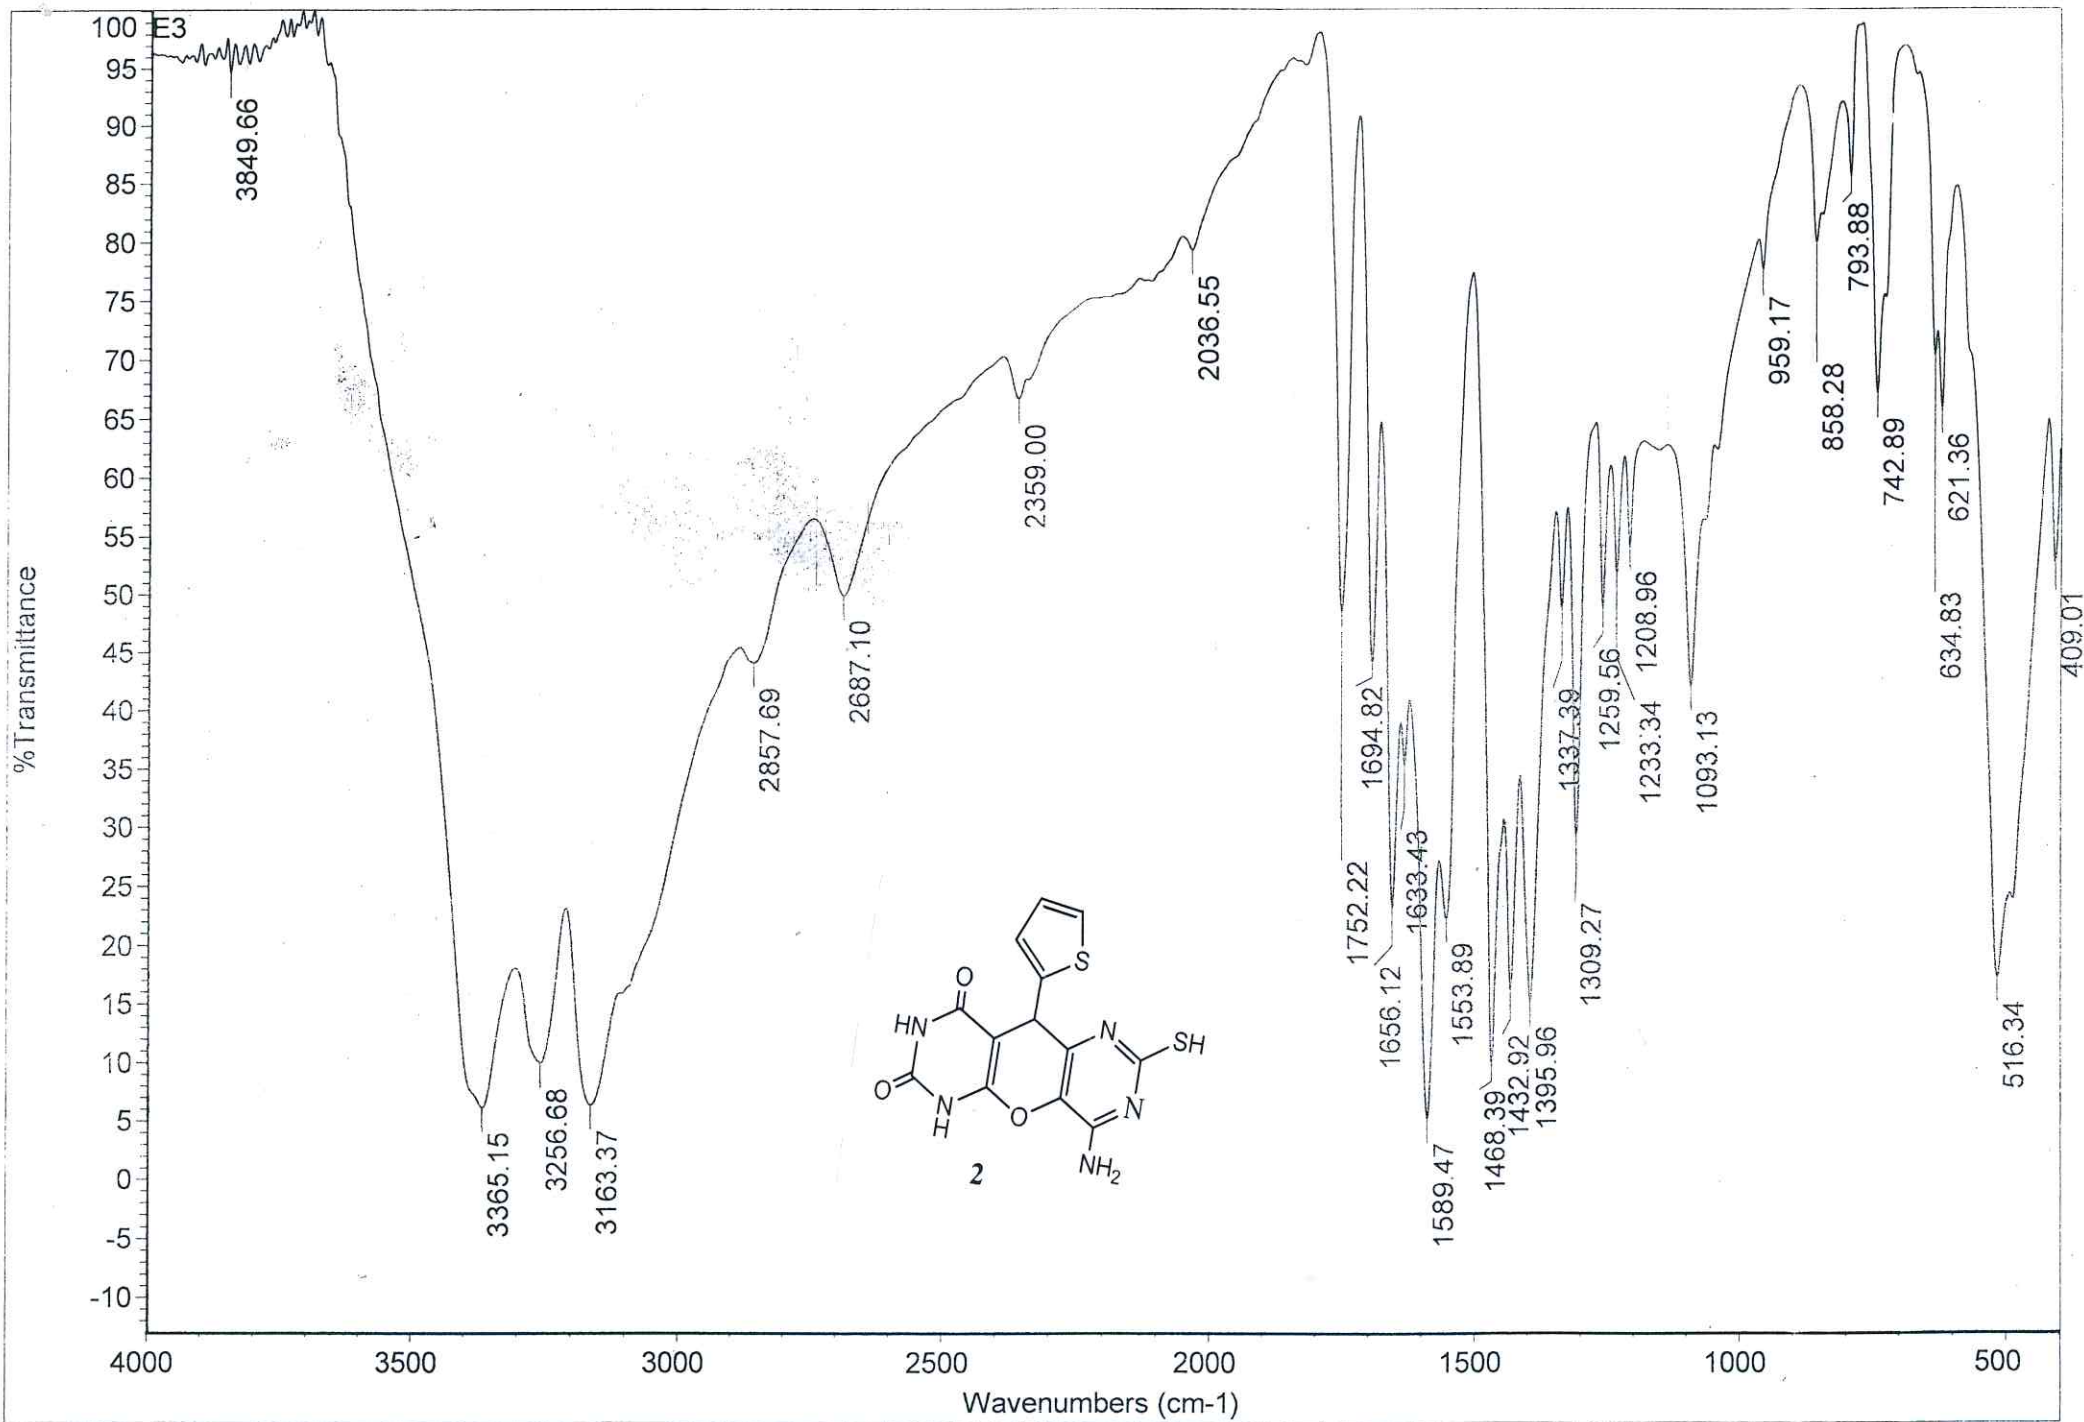

① Thio urea

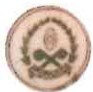

Dr-EmanHassan-E2

Sample Name **Dr-EmanHassan-E2**  
Date collected **2019-02-24**

Pulse sequence **PROTON**  
Solvent **DMSO**

Temperature **25**  
Spectrometer **nmr400-mercury400**

Laboratory **MODCL**  
NMR User

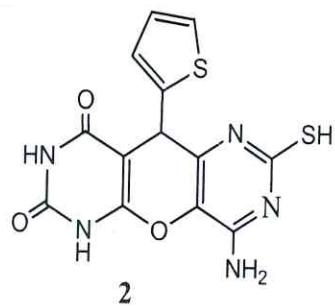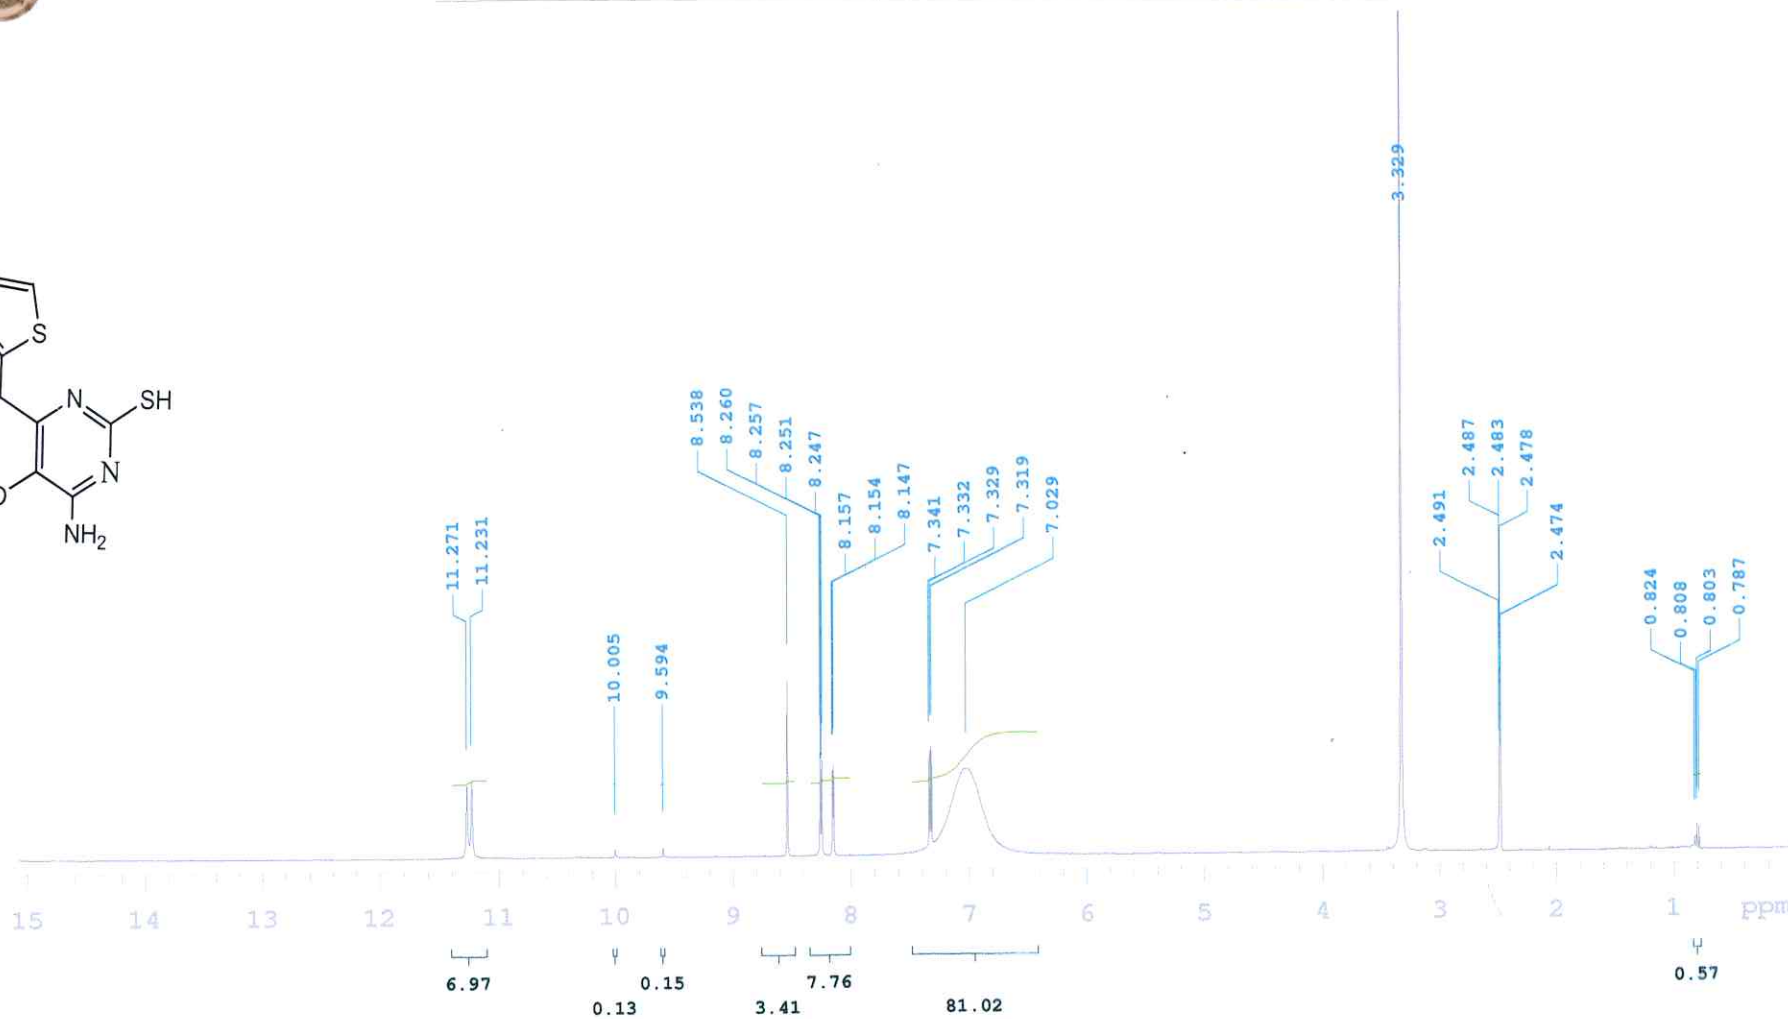

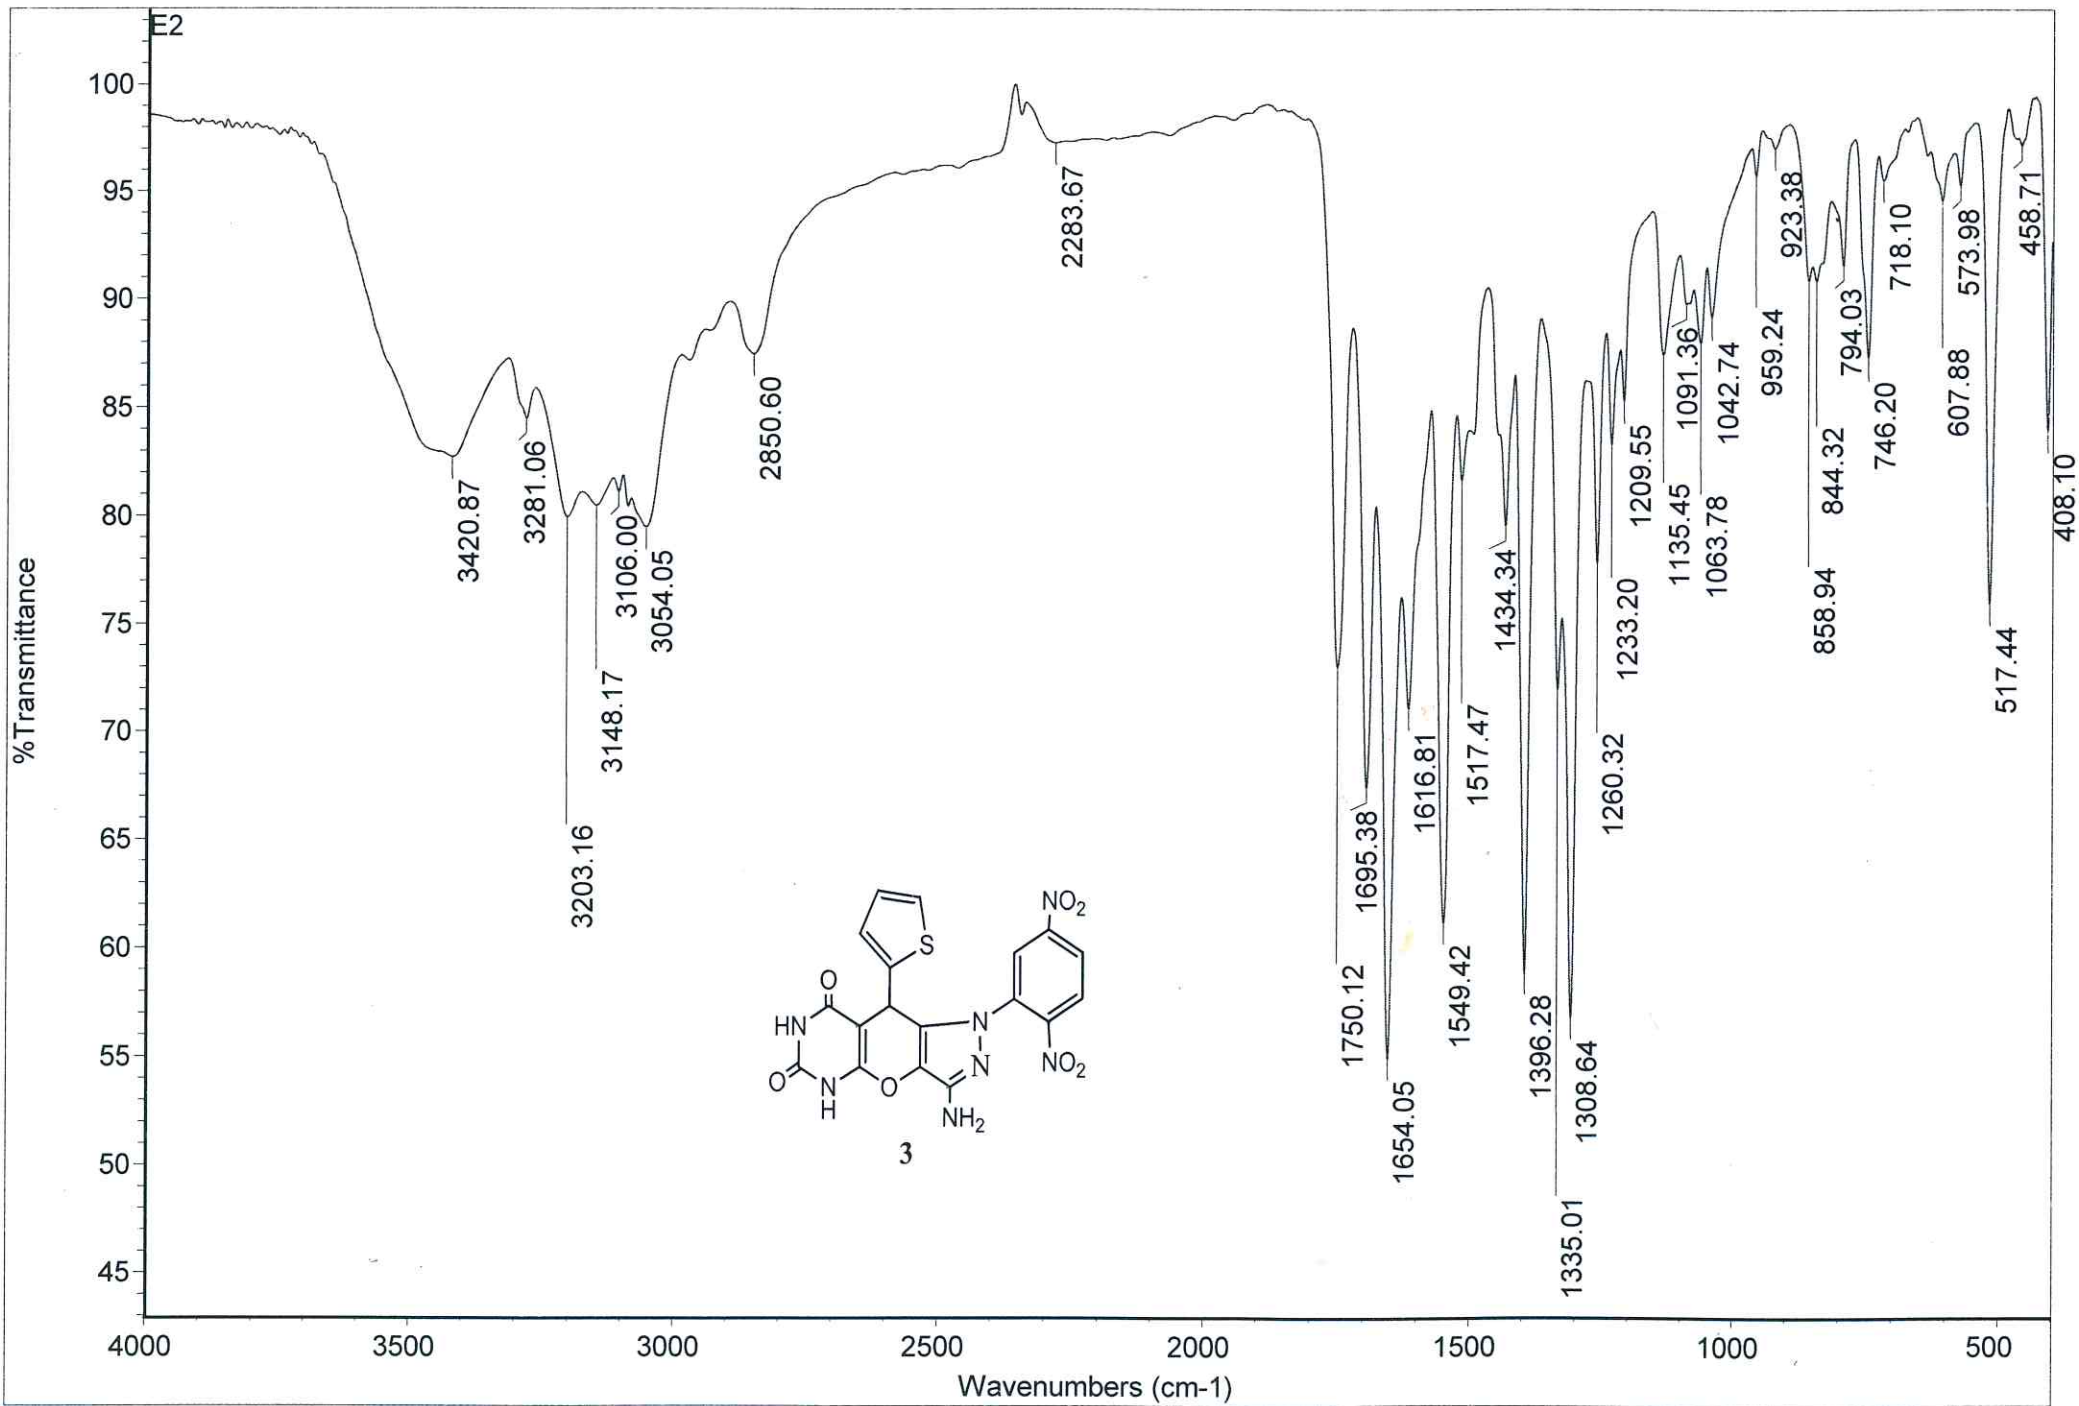

Dr\_EmanHassan-E3

Sample Name **Dr\_EmanHassan-E3**  
Date collected **2018-09-16**

Pulse sequence **PROTON**  
Solvent **DMSO**

Temperature **25**  
Spectrometer **nmr400-mercury400**

Laboratory **MODCL**  
NMR User **sameeh\_Albadawy**

Dr\_EmanHassan-E3

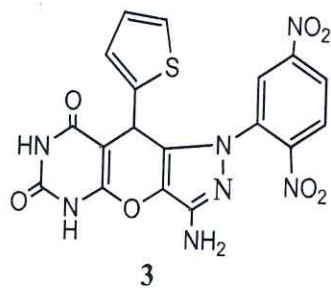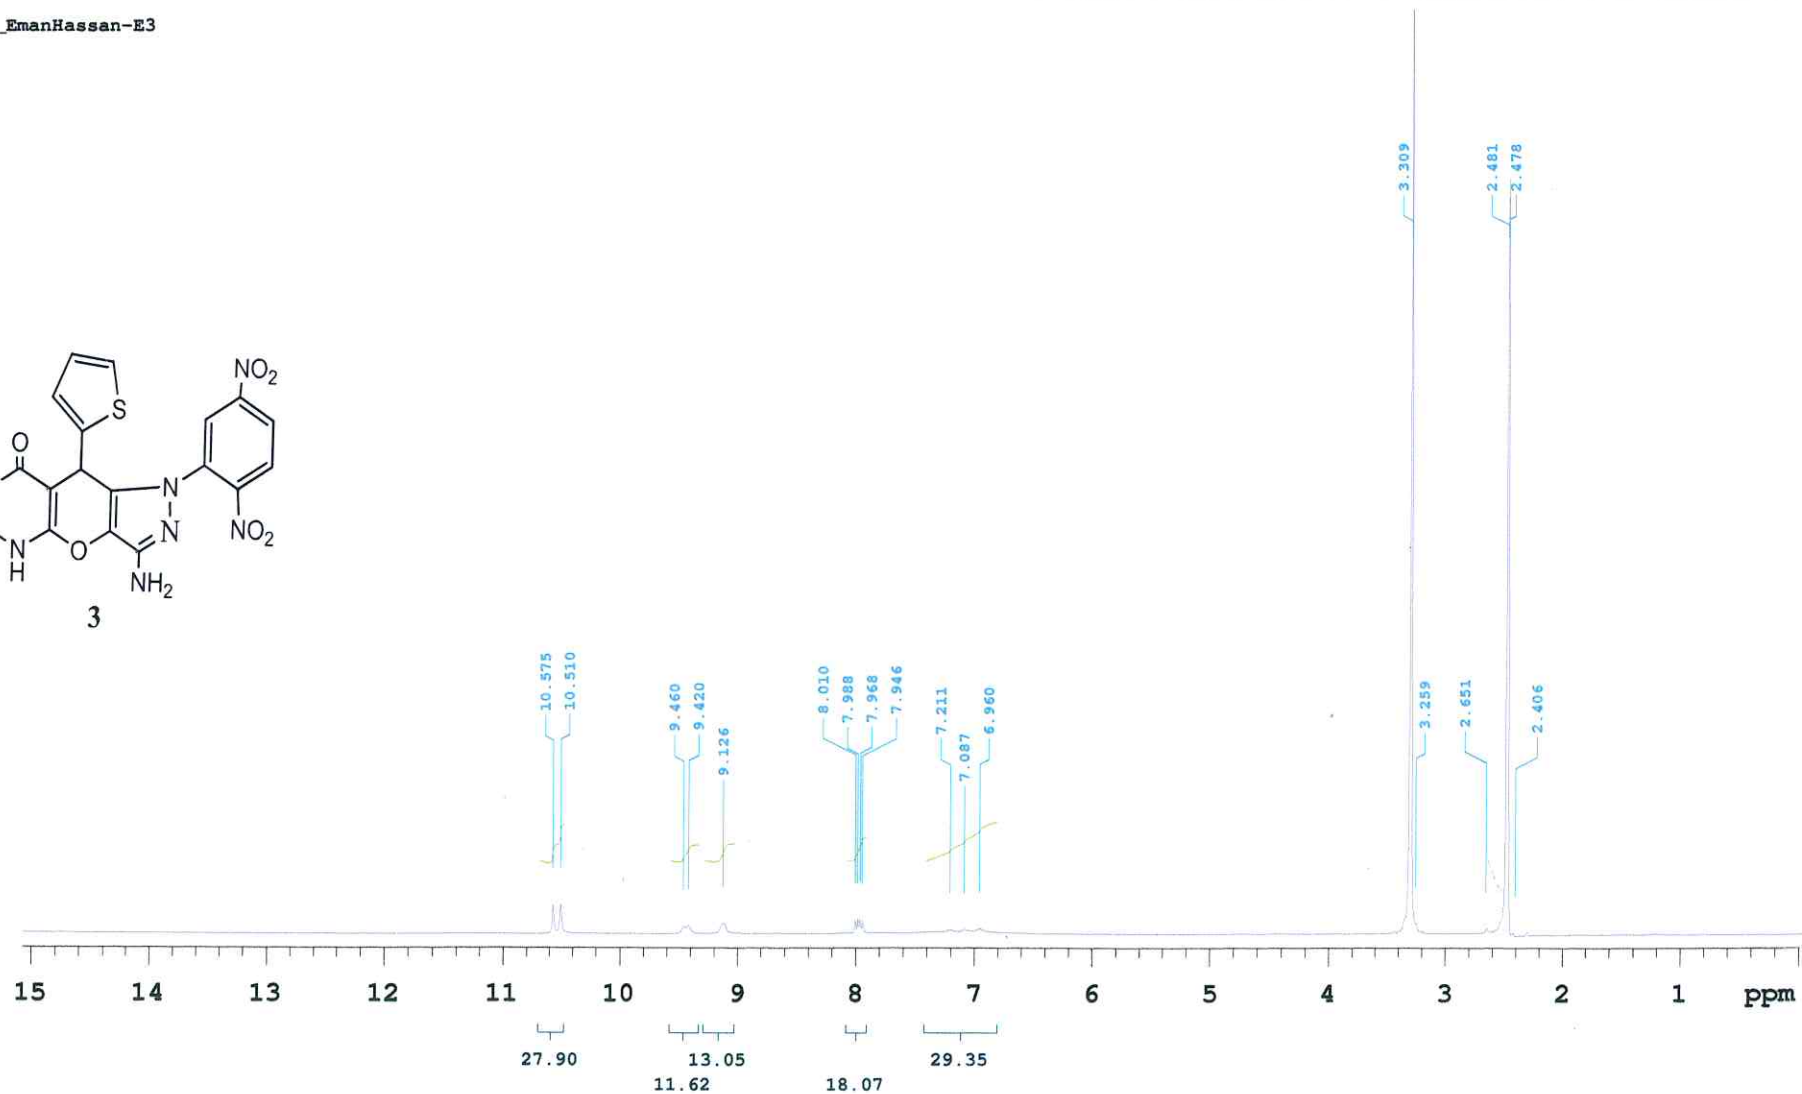

Plotname: Dr\_EmanHassan-E3\_PROTON\_01\_plot02

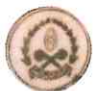

Dr-EmanHassan-E3

Dr-EmanHassan-E3

Sample Name **Dr-EmanHassan-E3**  
Date collected **2019-02-23**

Pulse sequence **CARBON**  
Solvent **DMSO**

Temperature **25**  
Spectrometer **nmr400-mercury400**

Laboratory **MODCL**  
NMR User

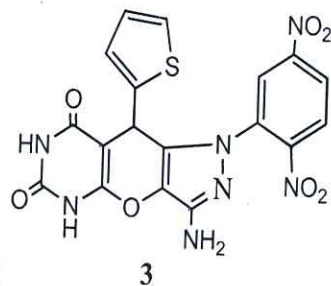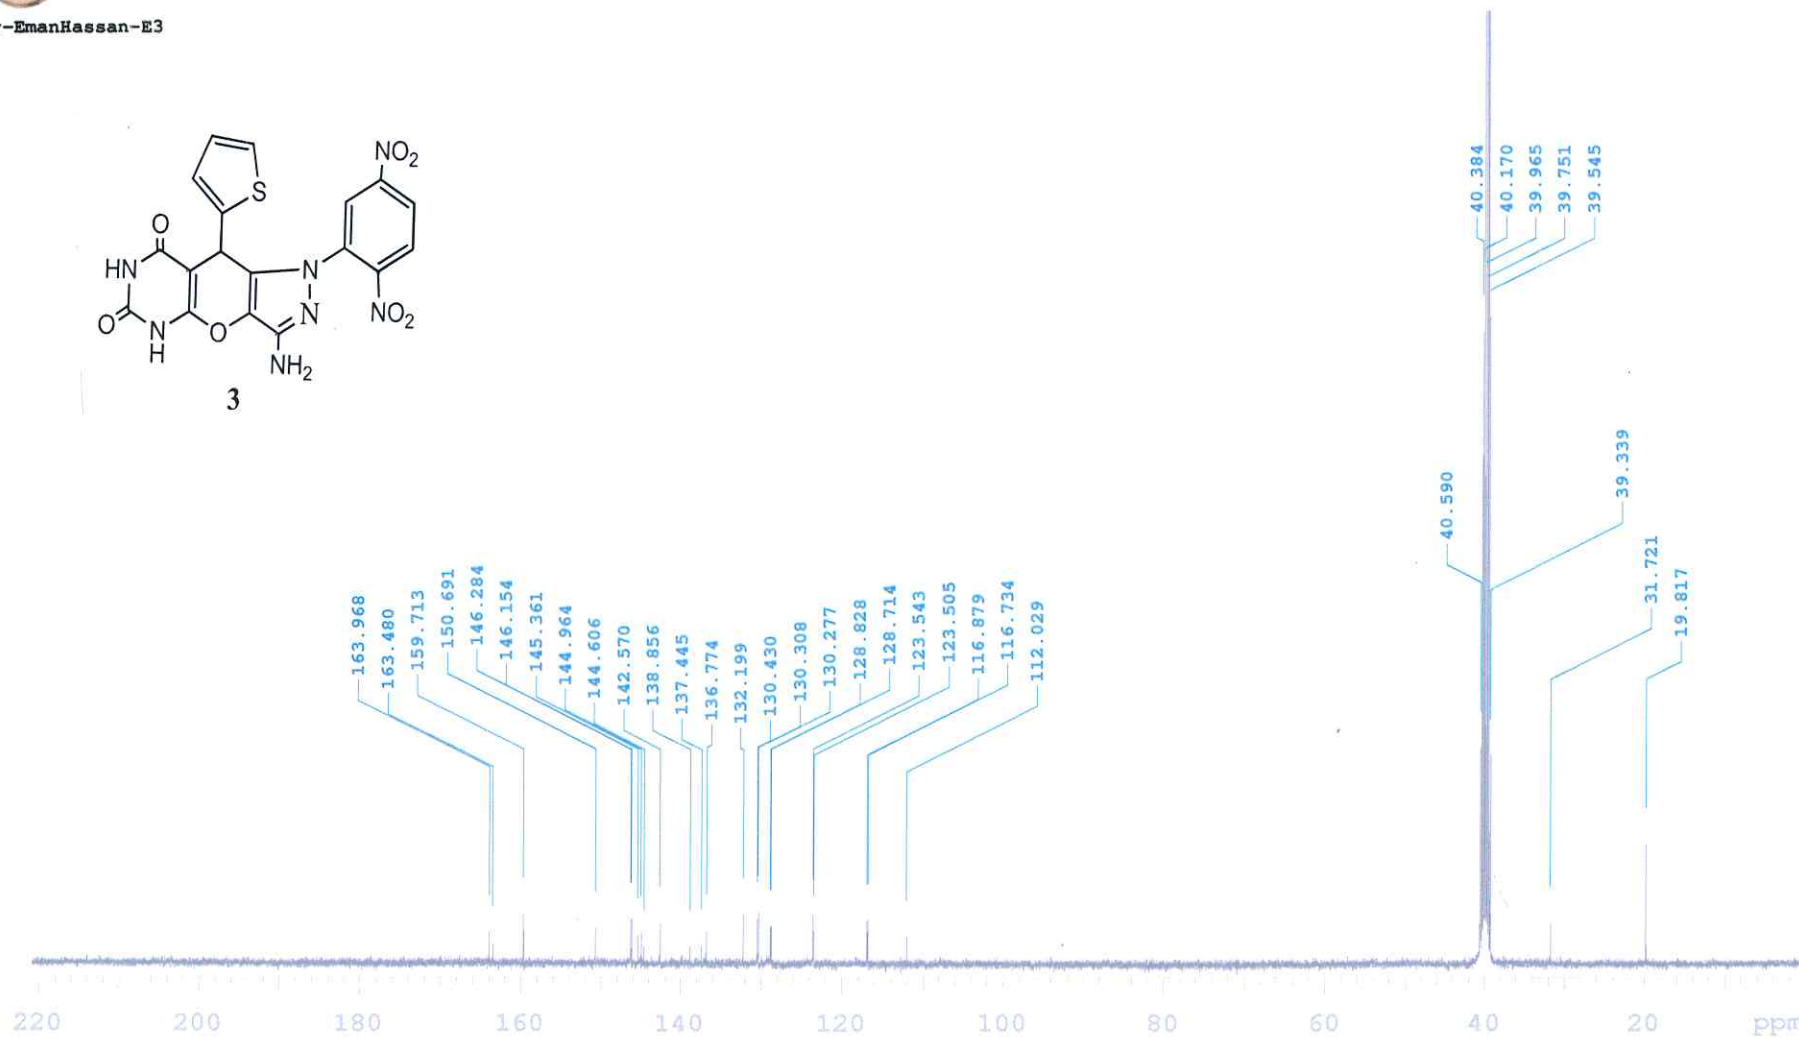

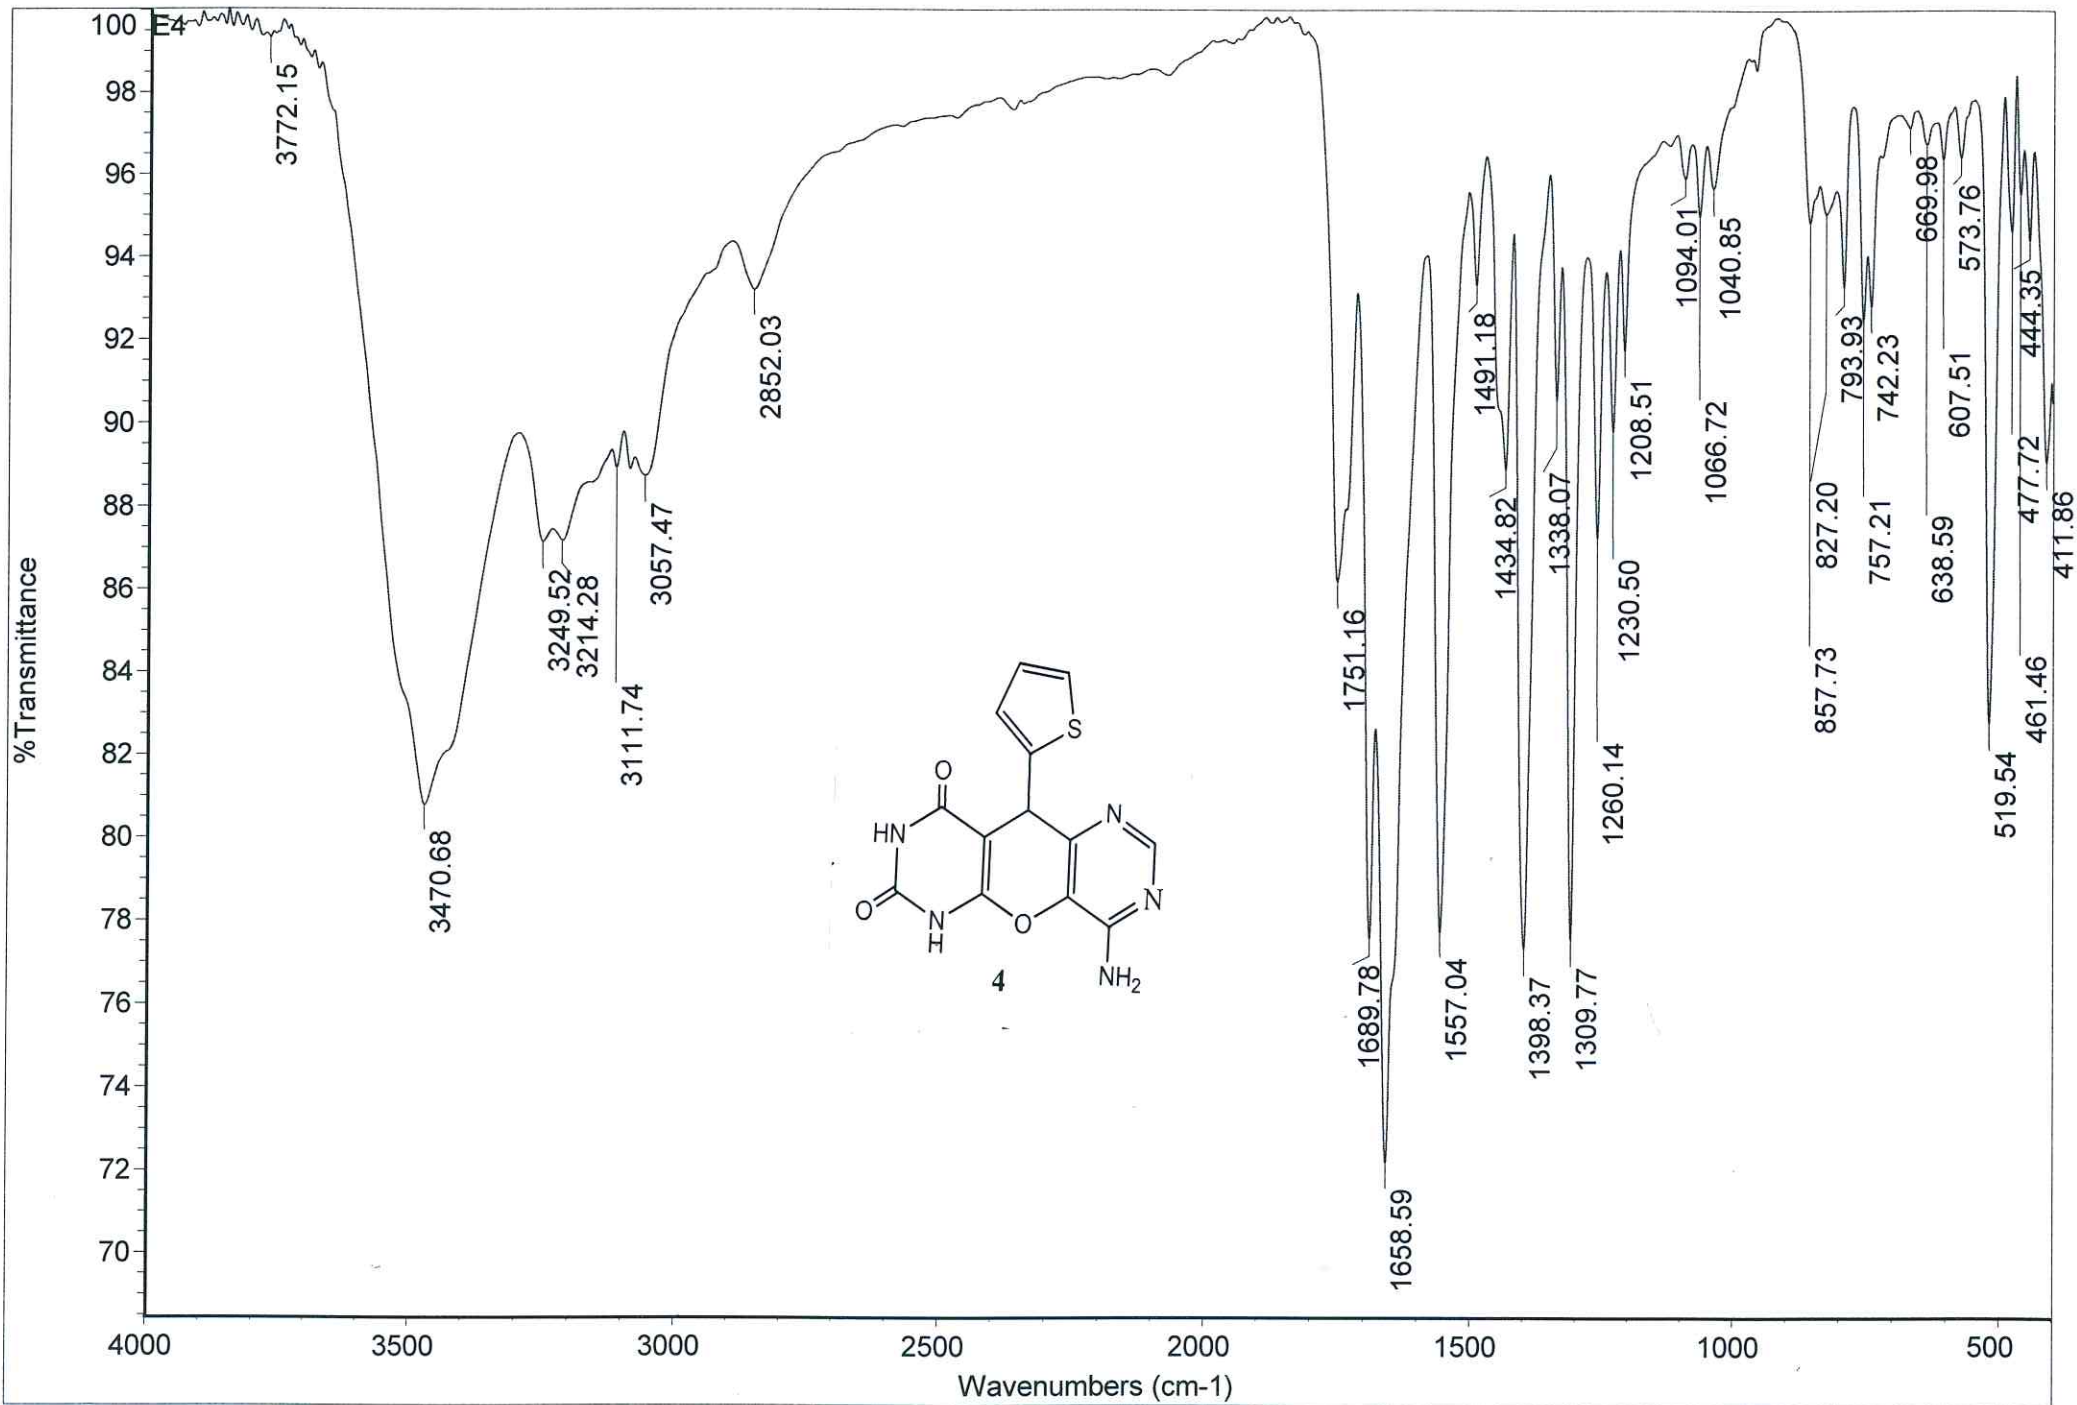



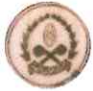

Dr-EmanHassan-E4

Sample Name **Dr-EmanHassan-E4**  
Date collected **2019-02-24**

Pulse sequence **PROTON**  
Solvent **DMSO**

Temperature **25**  
Spectrometer **nmr400-mercury400**

Laboratory **MODCL**  
NMR User **Cap-Ahmed zaher**

Dr-EmanHassan-E4

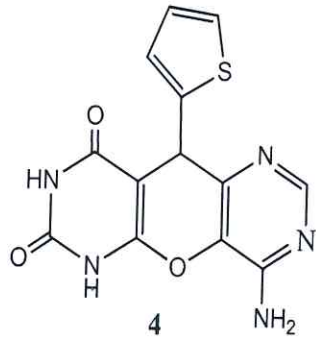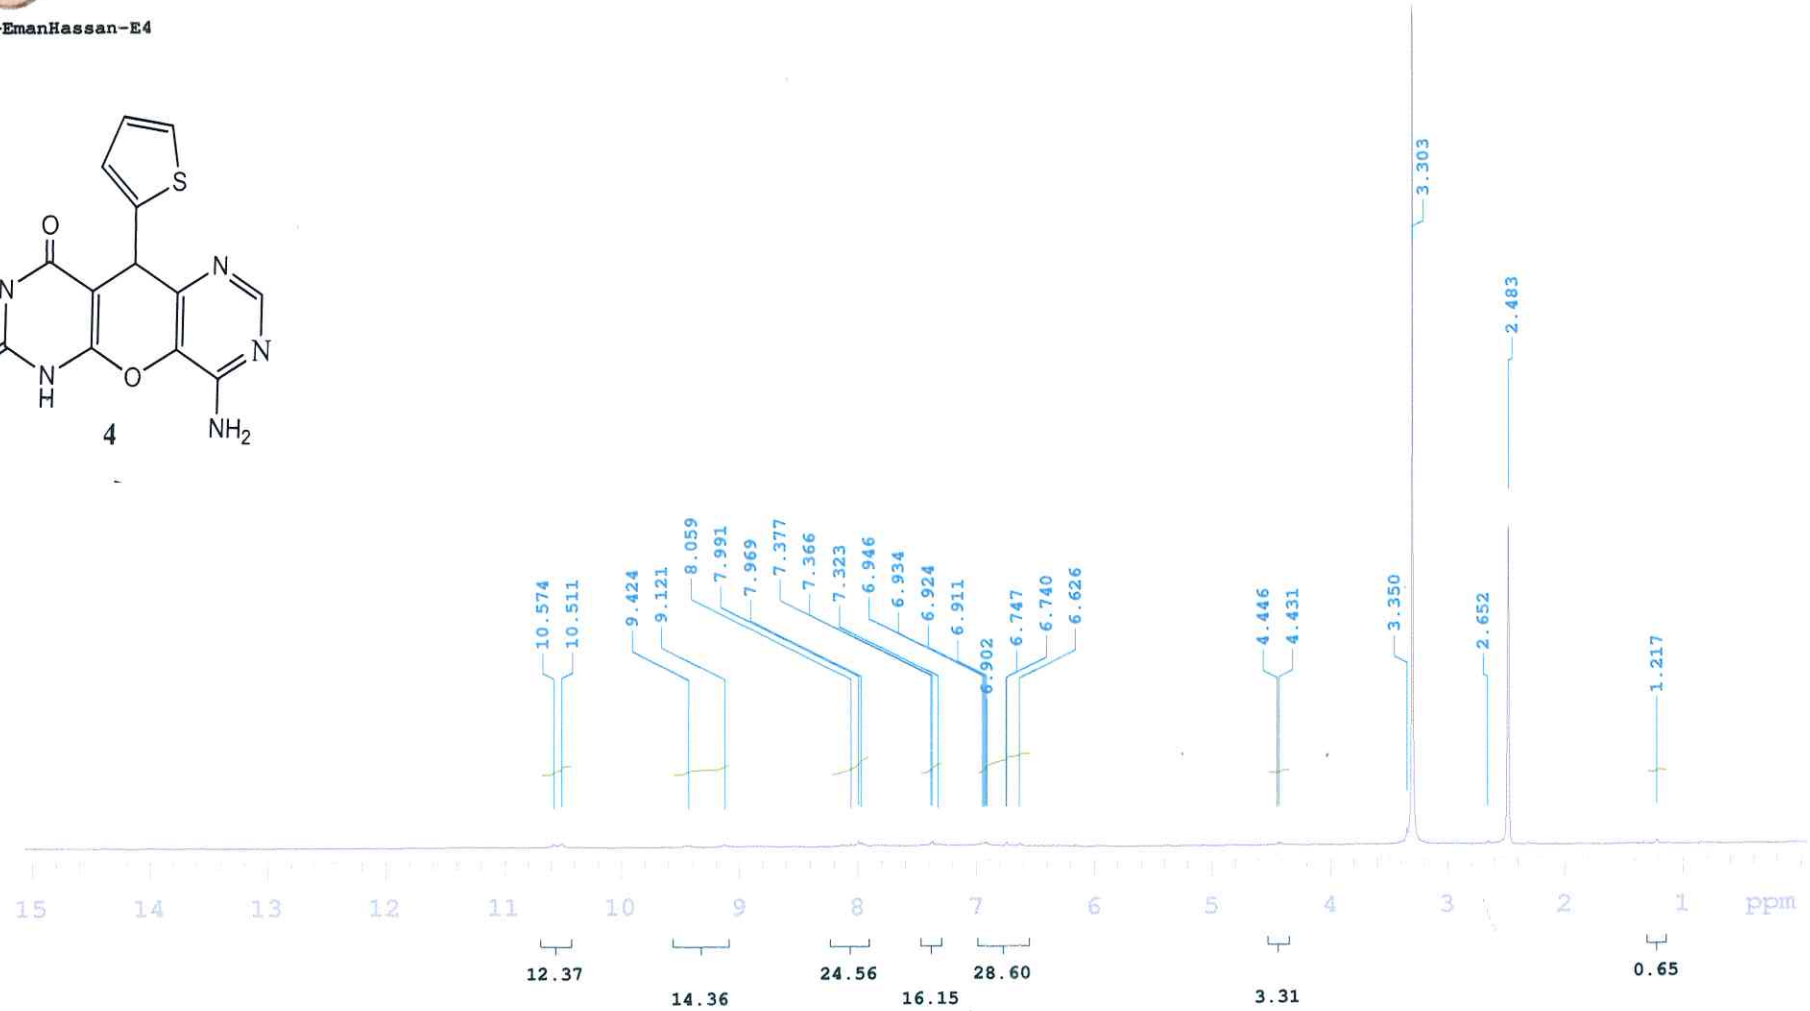

% Transmittance

100  
98  
96  
94  
92  
90  
88  
86  
84  
82  
80  
78  
76  
74  
72  
70

3772.15

3470.68

3249.52

3214.28

3111.74

3057.47

2852.03

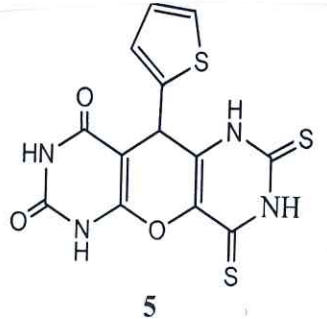

2500

2000

1751.16

1689.78

1658.59

1557.04

1491.18

1434.82

1398.37

1338.07

1309.77

1260.14

1230.50

1208.51

1094.01

1066.72

1040.85

857.73

827.20

793.93

757.21

742.23

669.98

638.59

607.51

573.76

519.54

477.72

444.35

461.46

444.35

411.86

Wavenumbers (cm-1)

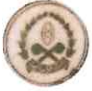

Dr-EmanHassan-E5

Dr-EmanHassan-E5

Sample Name **Dr-EmanHassan-E5**  
Date collected **2019-02-24**

Pulse sequence **PROTON**  
Solvent **DMSO**

Temperature **25**  
Spectrometer **nmr400-mercury400**

Laboratory **MODCL**  
NMR User

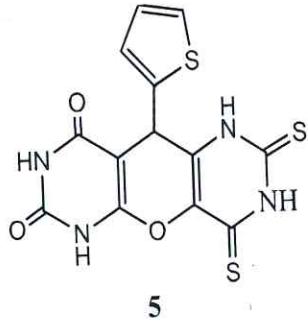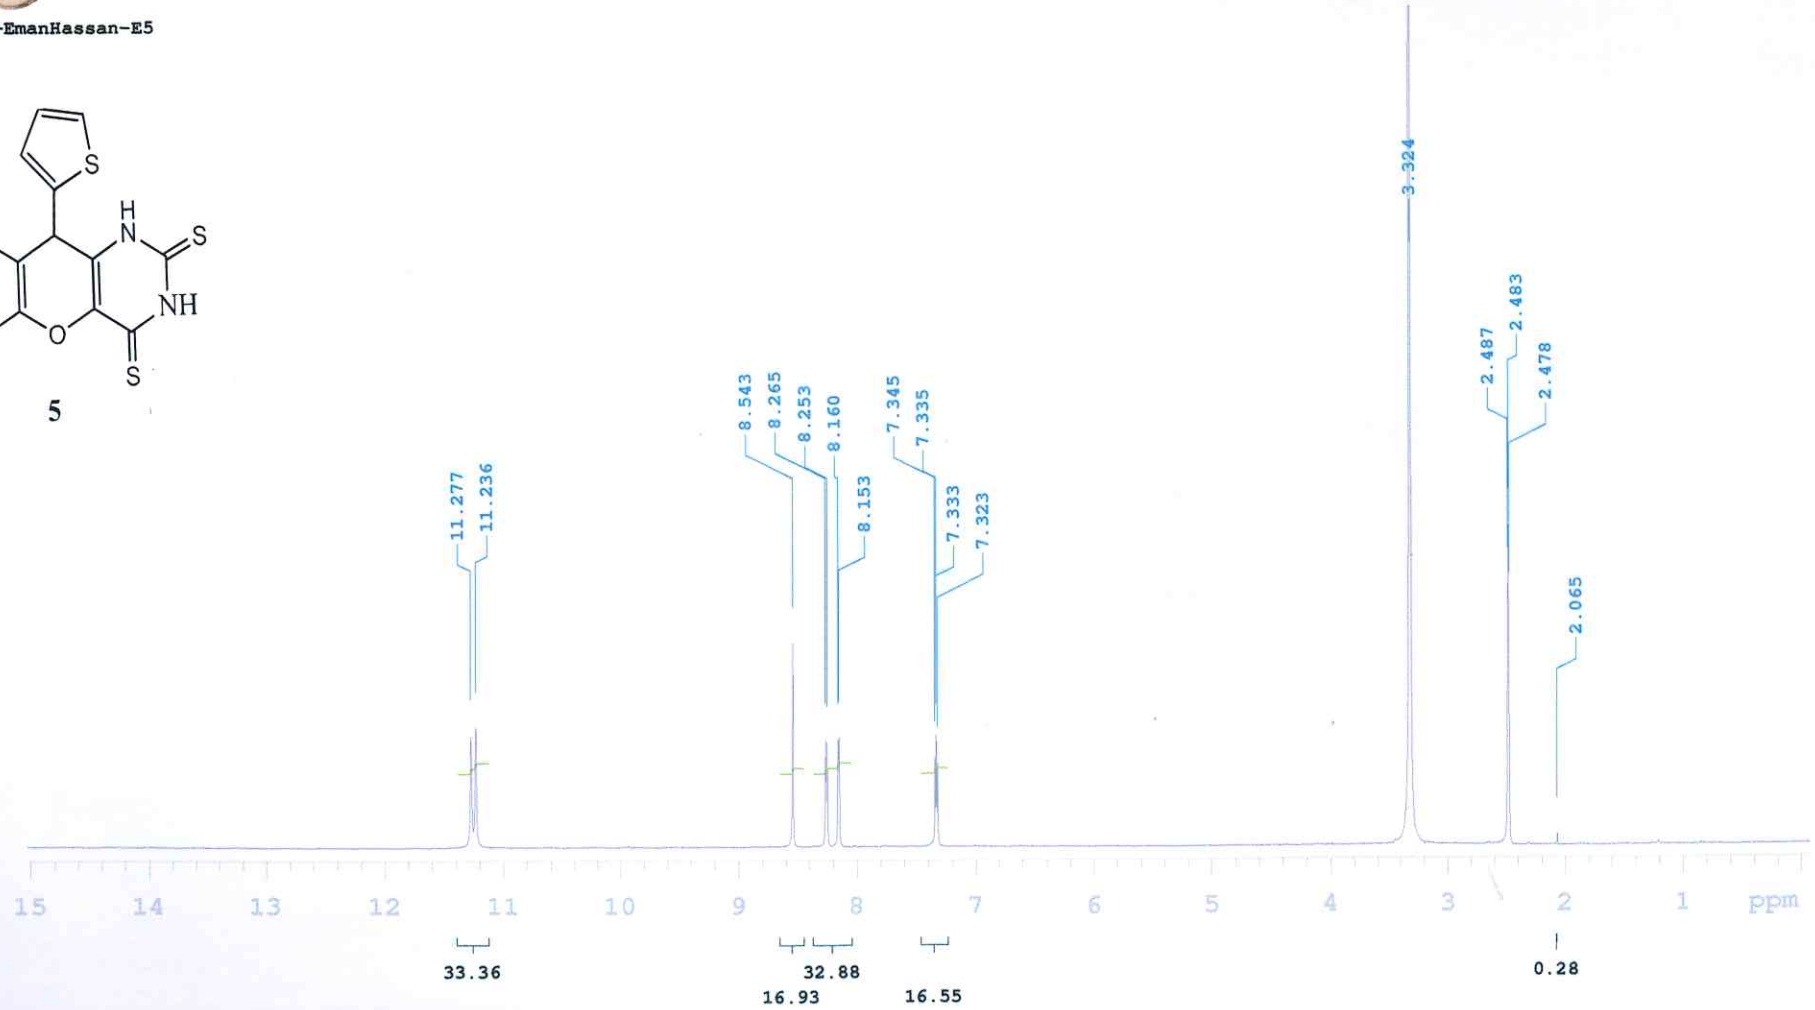

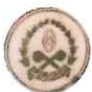

Dr-EmanHassan-E5

Dr-EmanHassan-E5

Sample Name **Dr-EmanHassan-E5**  
Date collected **2019-02-24**

Pulse sequence **CARBON**  
Solvent **DMSO**

Temperature **25**  
Spectrometer **nmr400-mercury400**

Laboratory **MODCL**  
NMR User

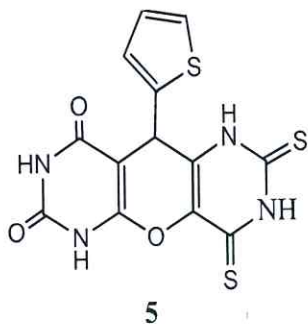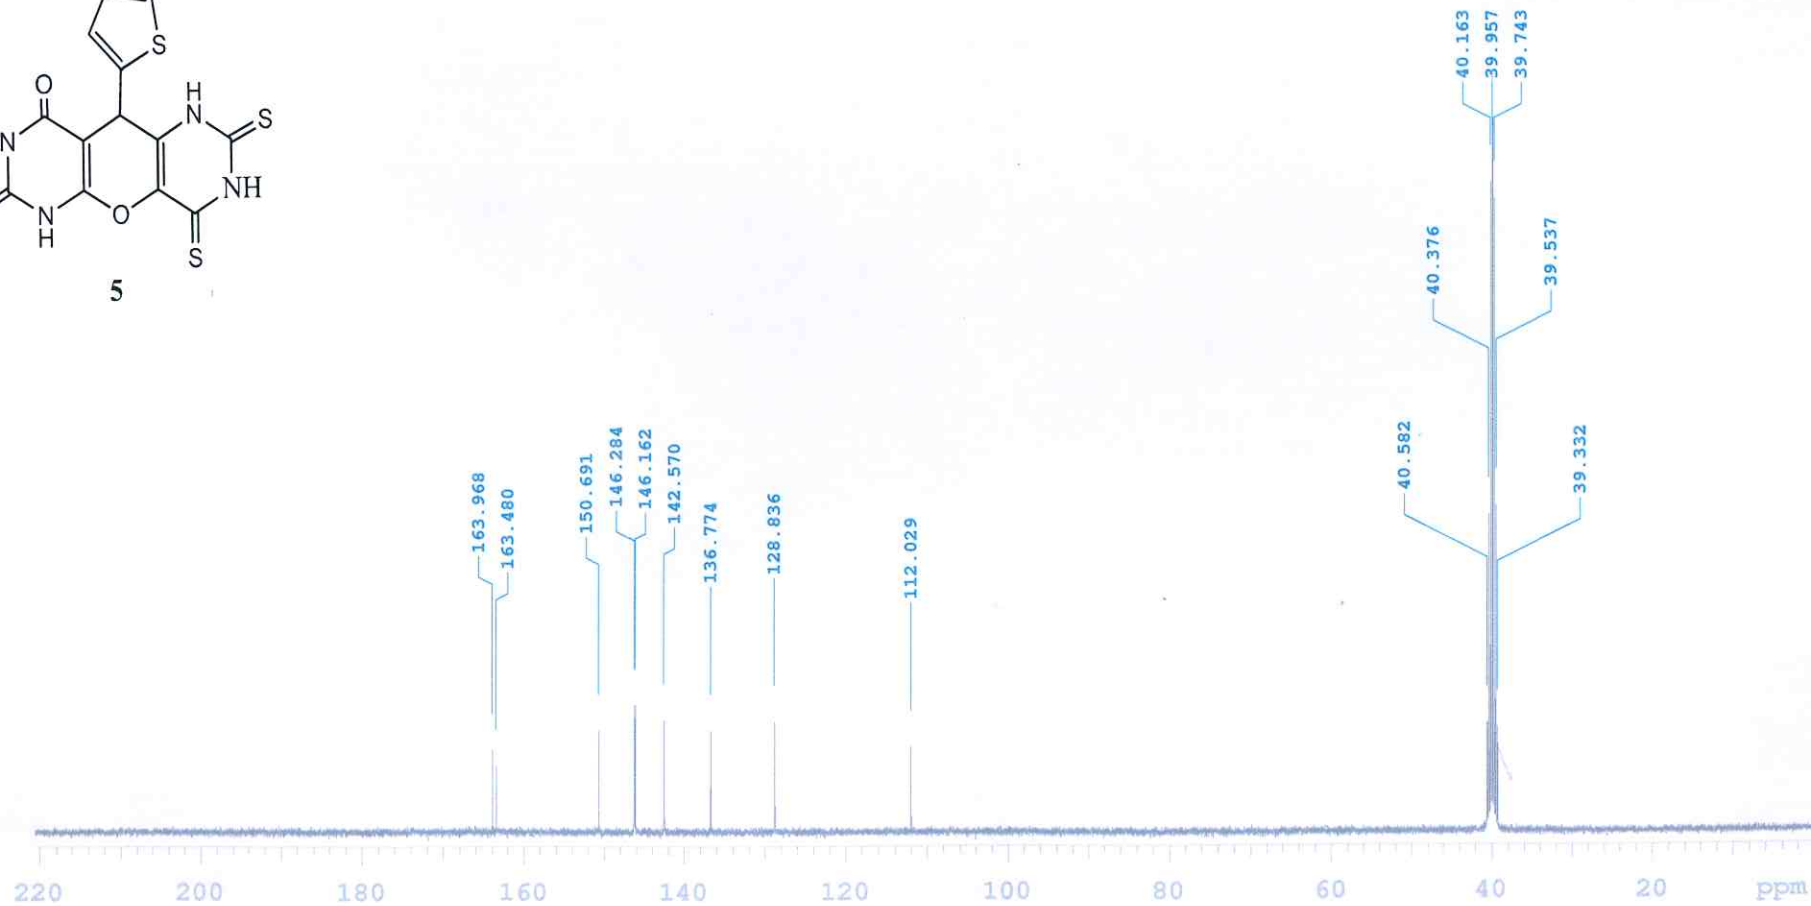

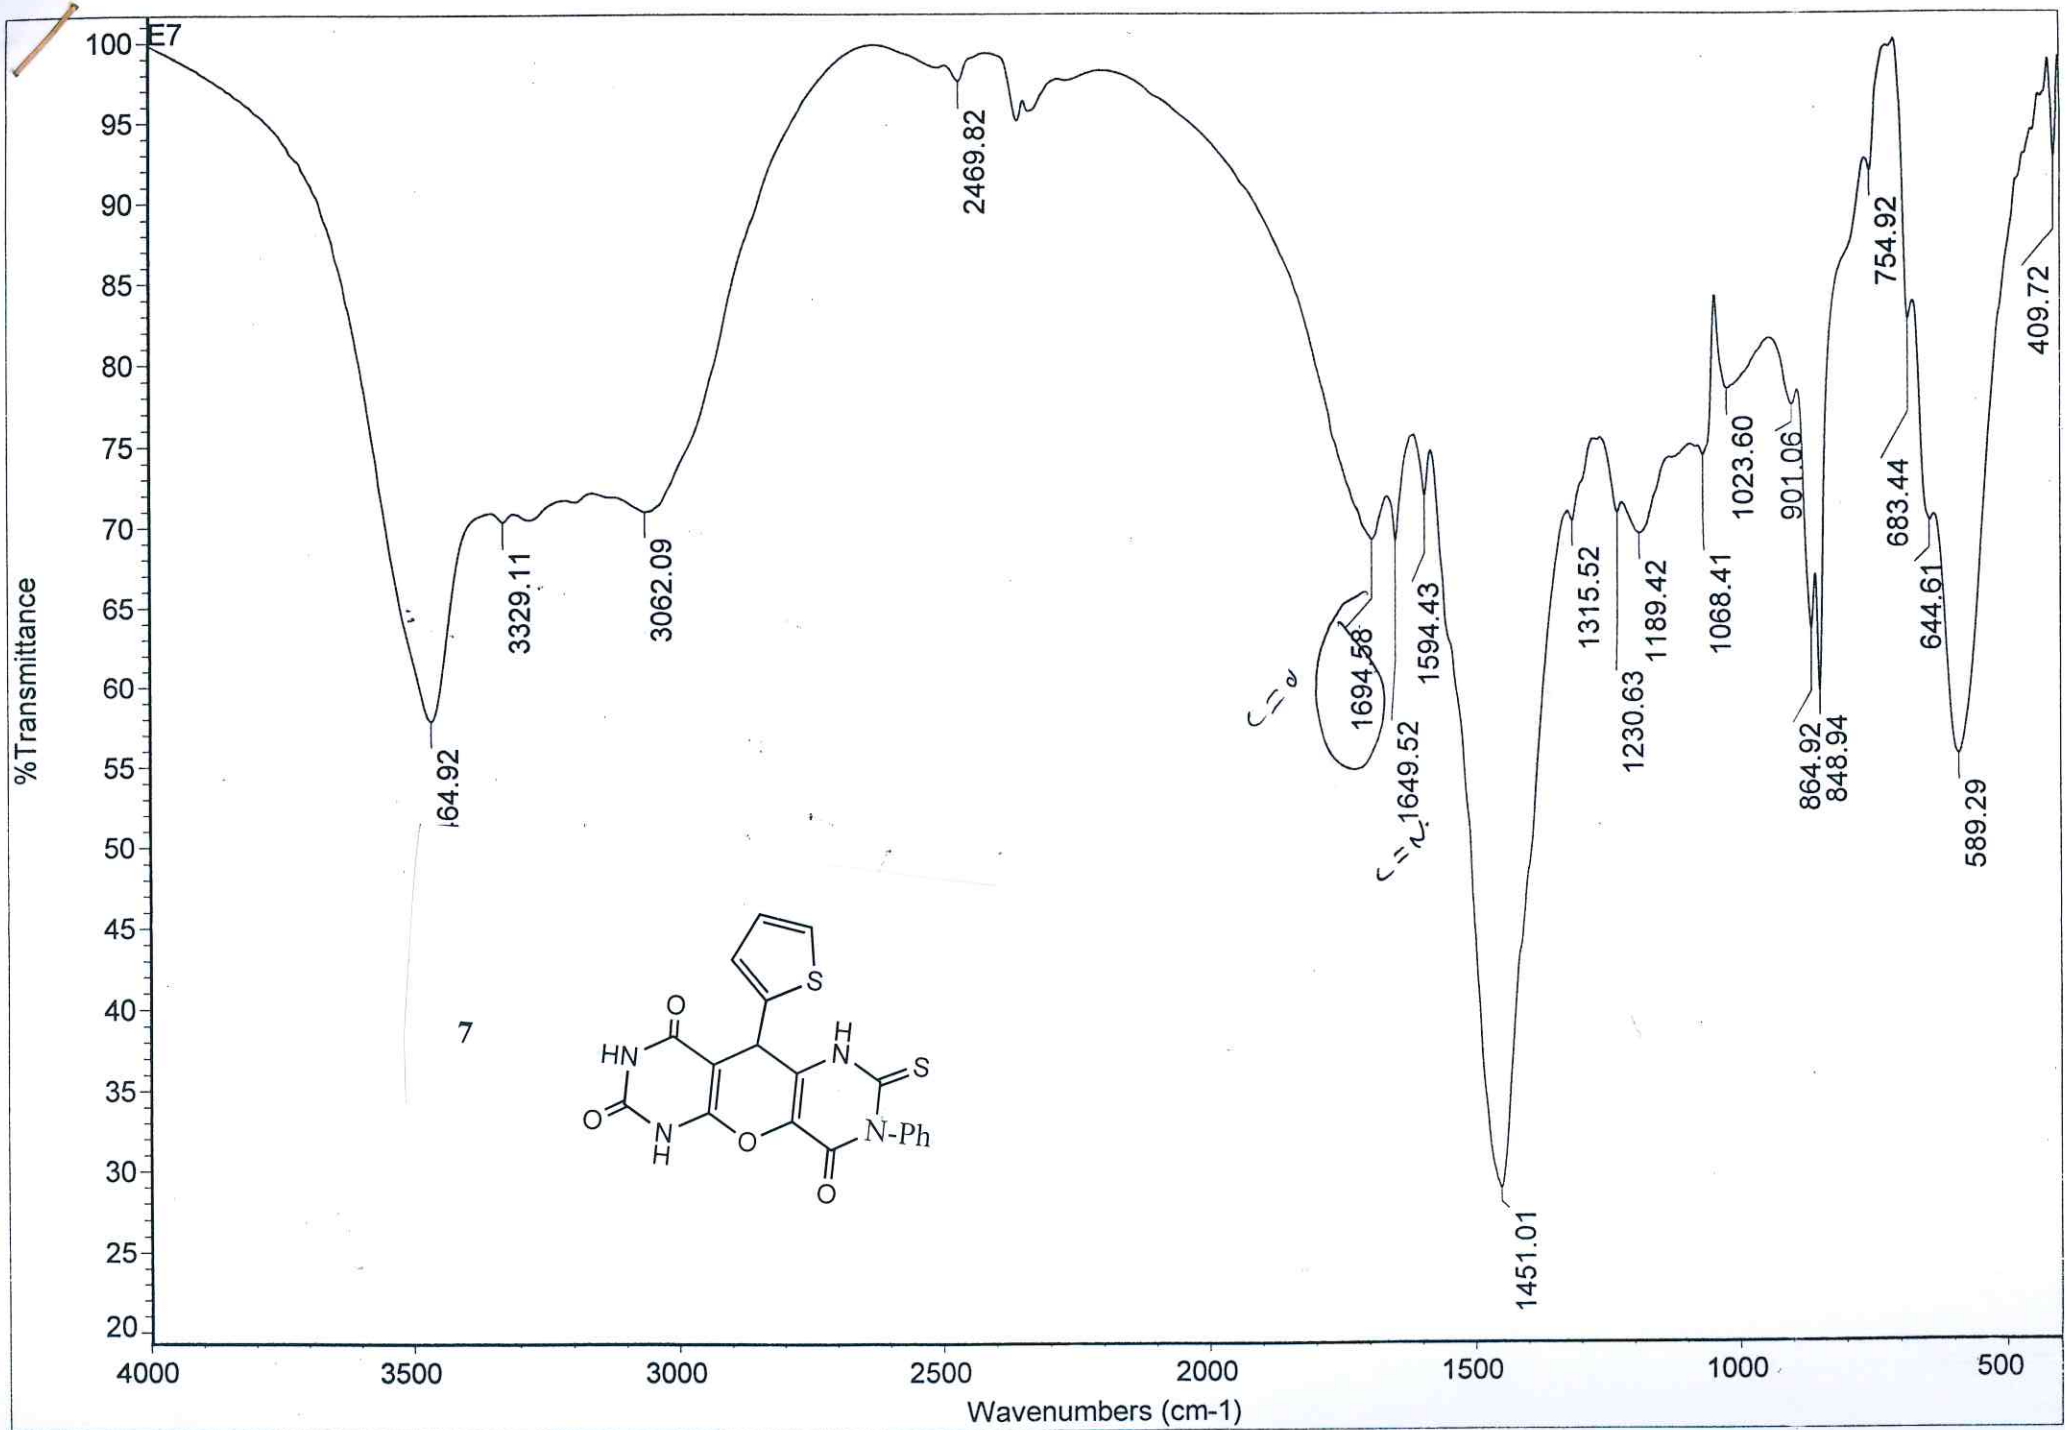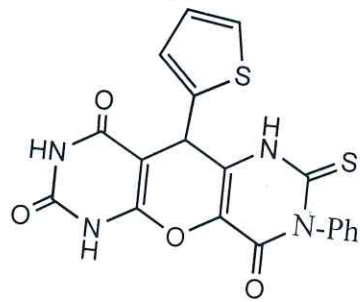

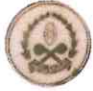

Dr-EmanHassan-E7

Dr-EmanHassan-E7

Sample Name **Dr-EmanHassan-E7**  
Date collected **2019-02-24**

Pulse sequence **PROTON**  
Solvent **DMSO**

Temperature **25**  
Spectrometer **nmr400-mercury400**

Laboratory **MODCL**  
NMR User **Cap-Ahmed zaher**

7

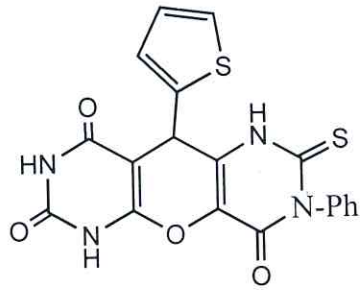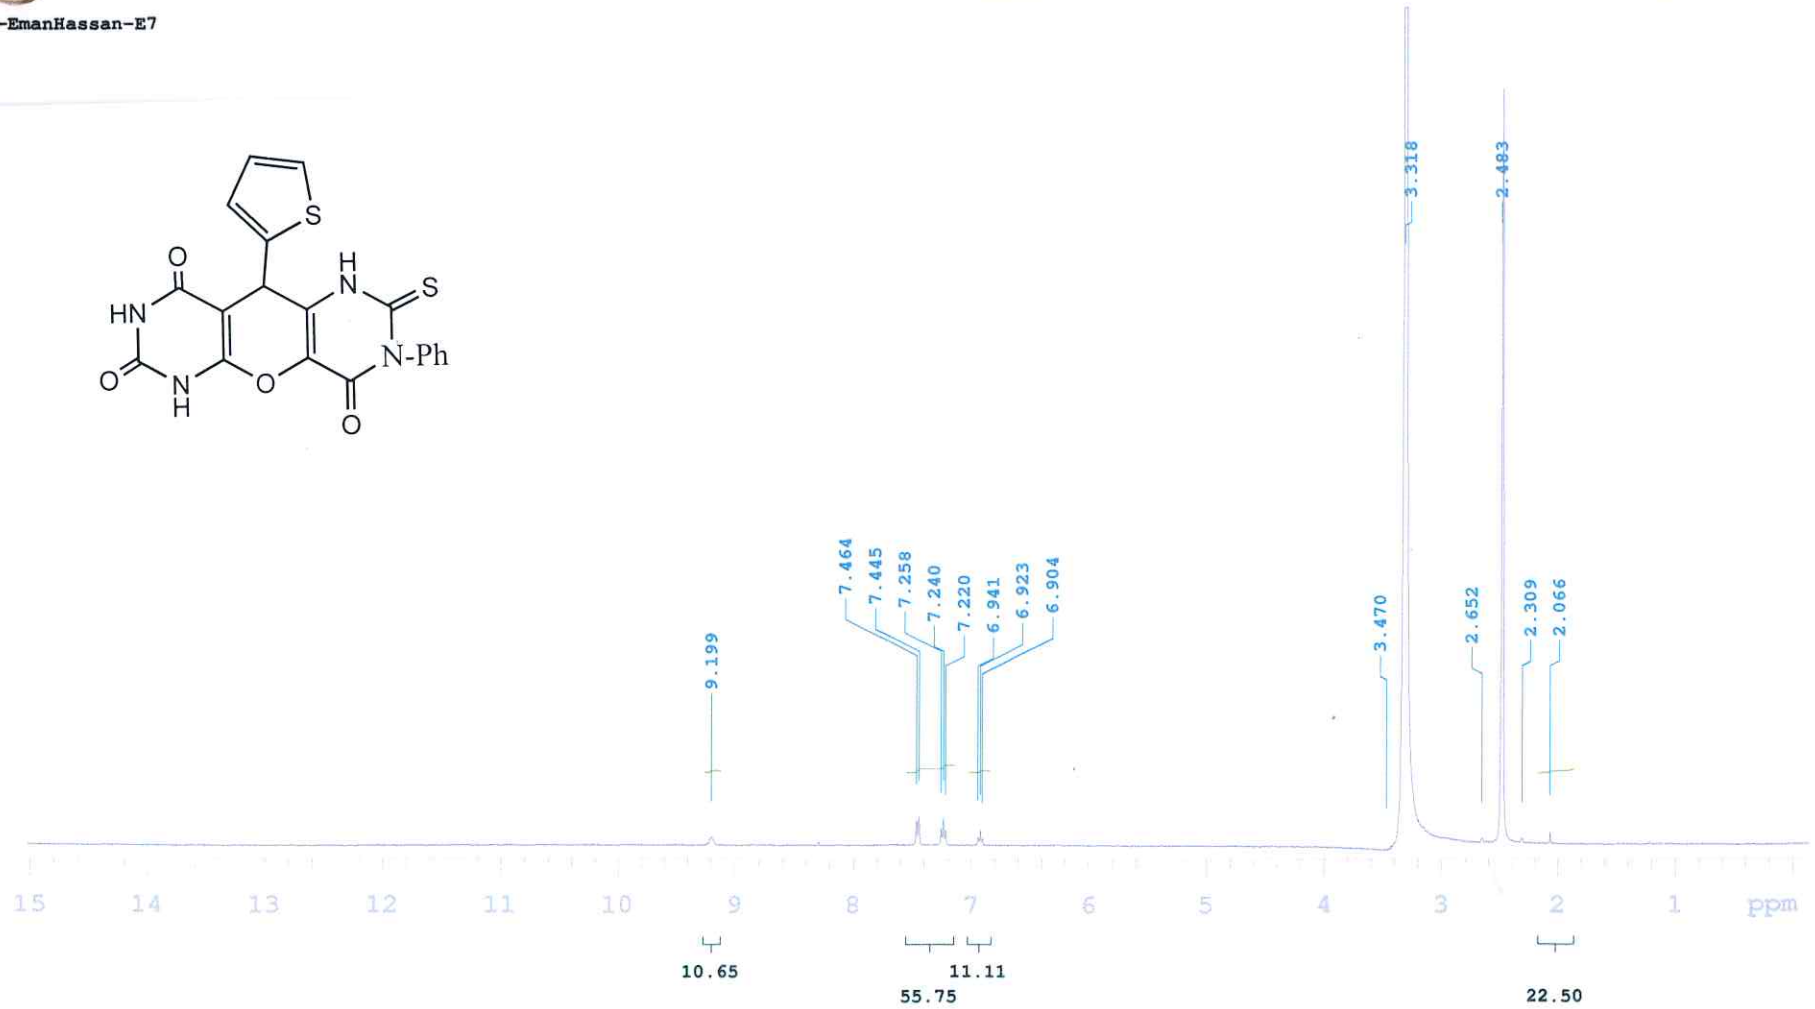

Dr\_EmanHassan-E6

Sample Name **Dr\_EmanHassan-E6**  
Date collected **2018-09-16**

Pulse sequence **PROTON**  
Solvent **DMSO**

Temperature **25**  
Spectrometer **nmr400-mercury400**

Laboratory **MODCL**  
NMR User **sameeh\_Albadowy**

Dr\_EmanHassan-E6

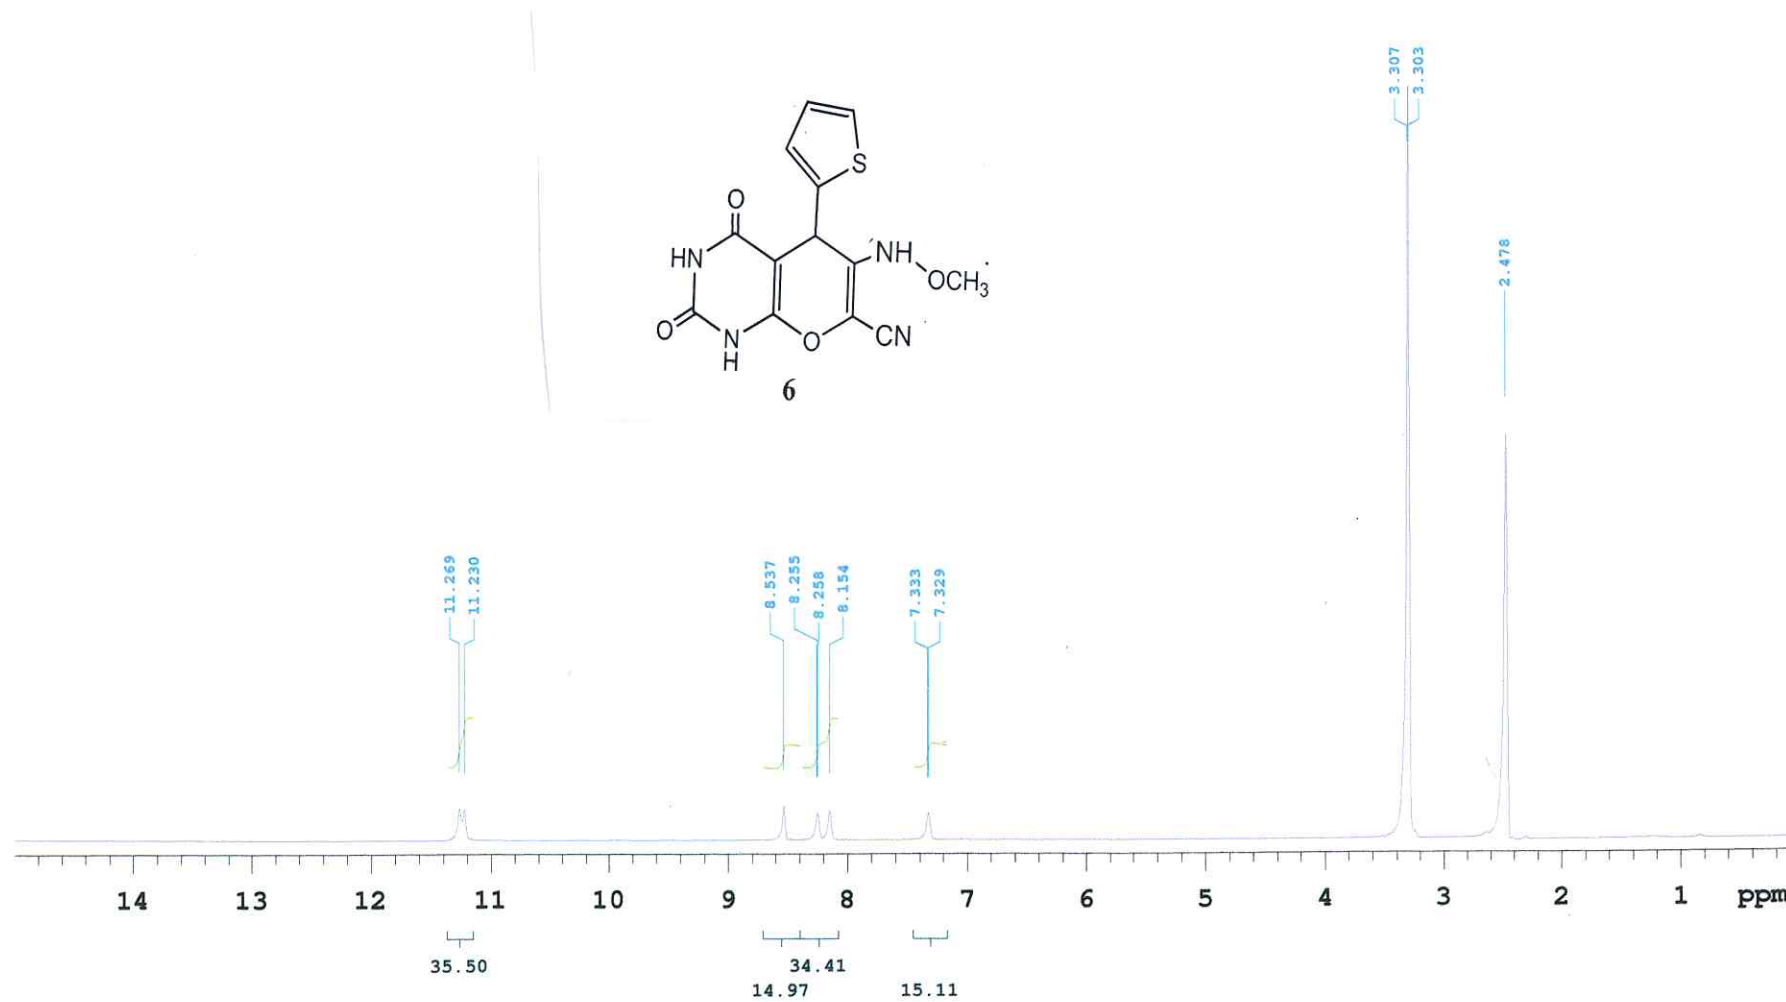

Plotname: Dr\_EmanHassan-E6\_PROTON\_01\_plot02

Data file /home/data/NMRlab2018/Sep/Dr\_EmanHassan-E6\_20180916\_01/Dr\_EmanHassan-E6\_PROTON\_01

Plot date 2018-09-16

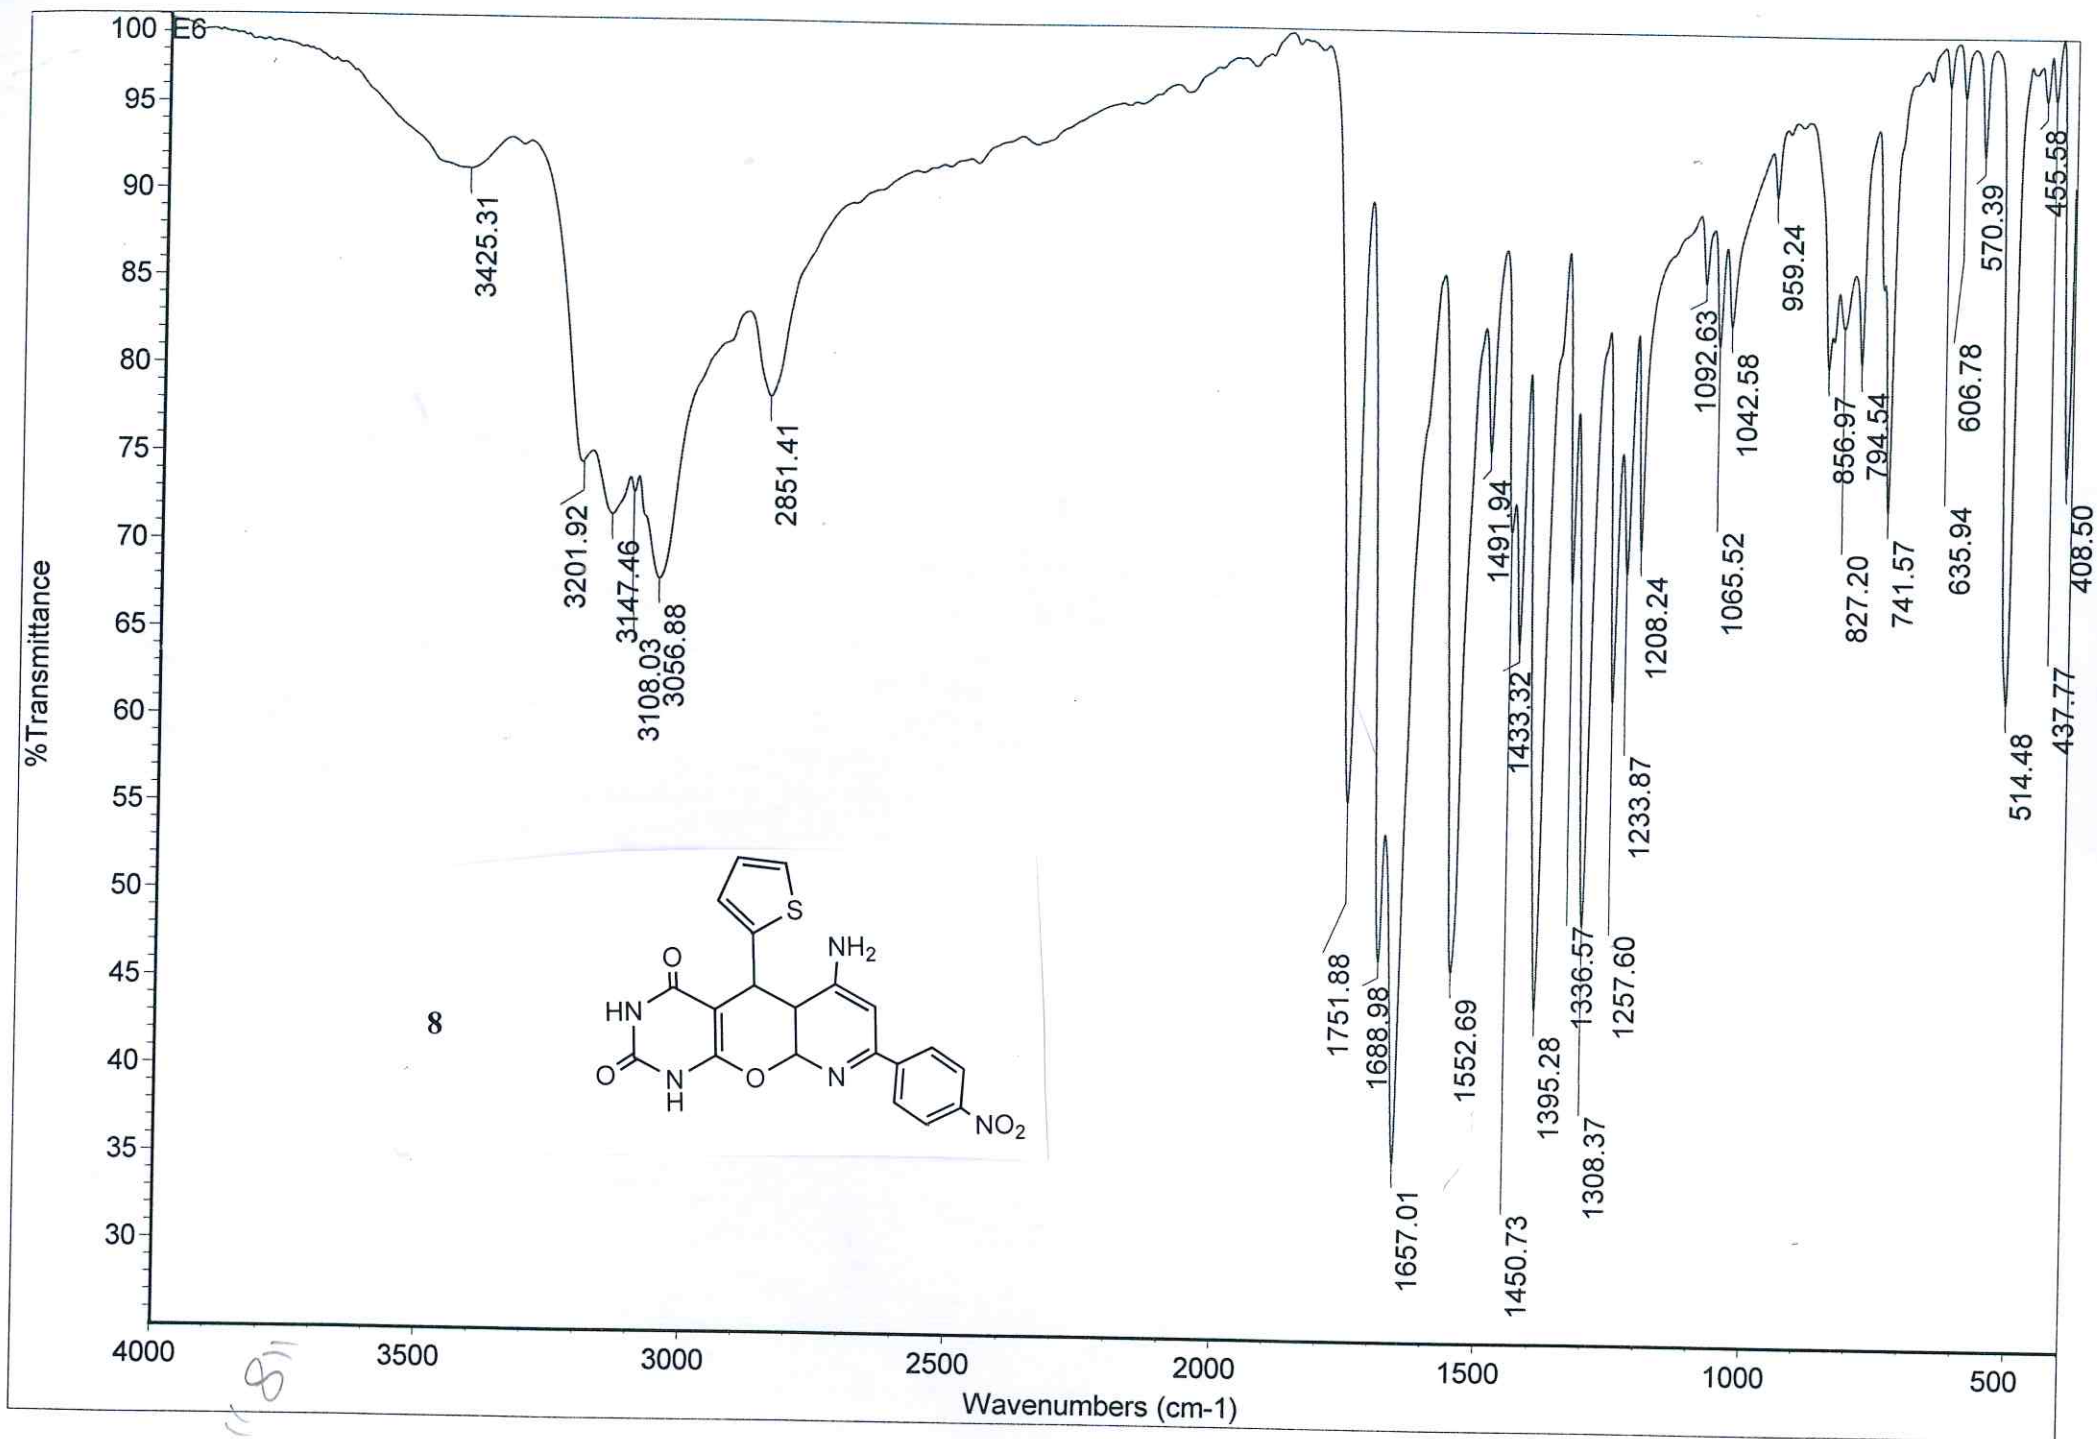



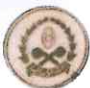

Dr-EmanHassan-E8

Dr-EmanHassan-E8

Sample Name **Dr-EmanHassan-E8**  
Date collected **2019-02-23**

Pulse sequence **PROTON**  
Solvent **DMSO**

Temperature **25**  
Spectrometer **nmr400-mercury400**

Laboratory **MODCL**  
NMR User

8

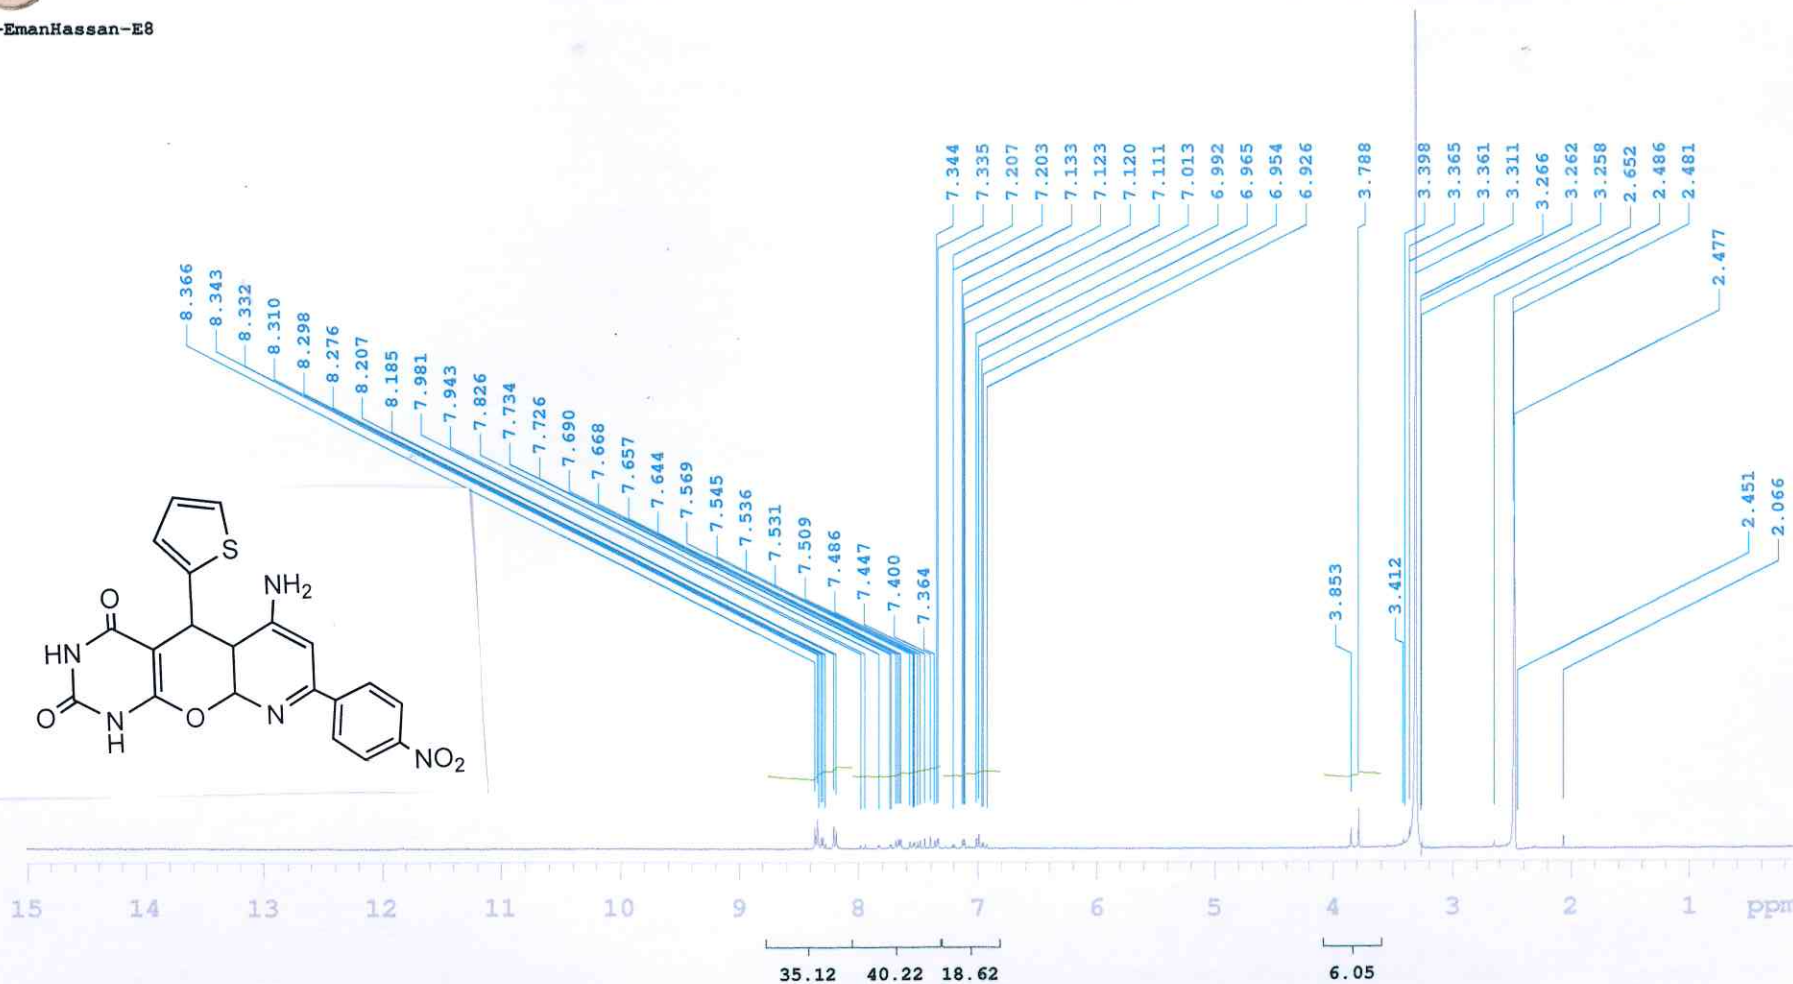

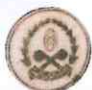

Dr-EmanHassan-E8

Dr-EmanHassan-E8

Sample Name **Dr-EmanHassan-E8**  
Date collected **2019-02-23**

Pulse sequence **CARBON**  
Solvent **DMSO**

Temperature **25**  
Spectrometer **nmr400-mercury400**

Laboratory **MODCL**  
NMR User

8

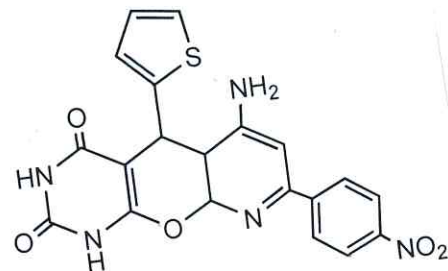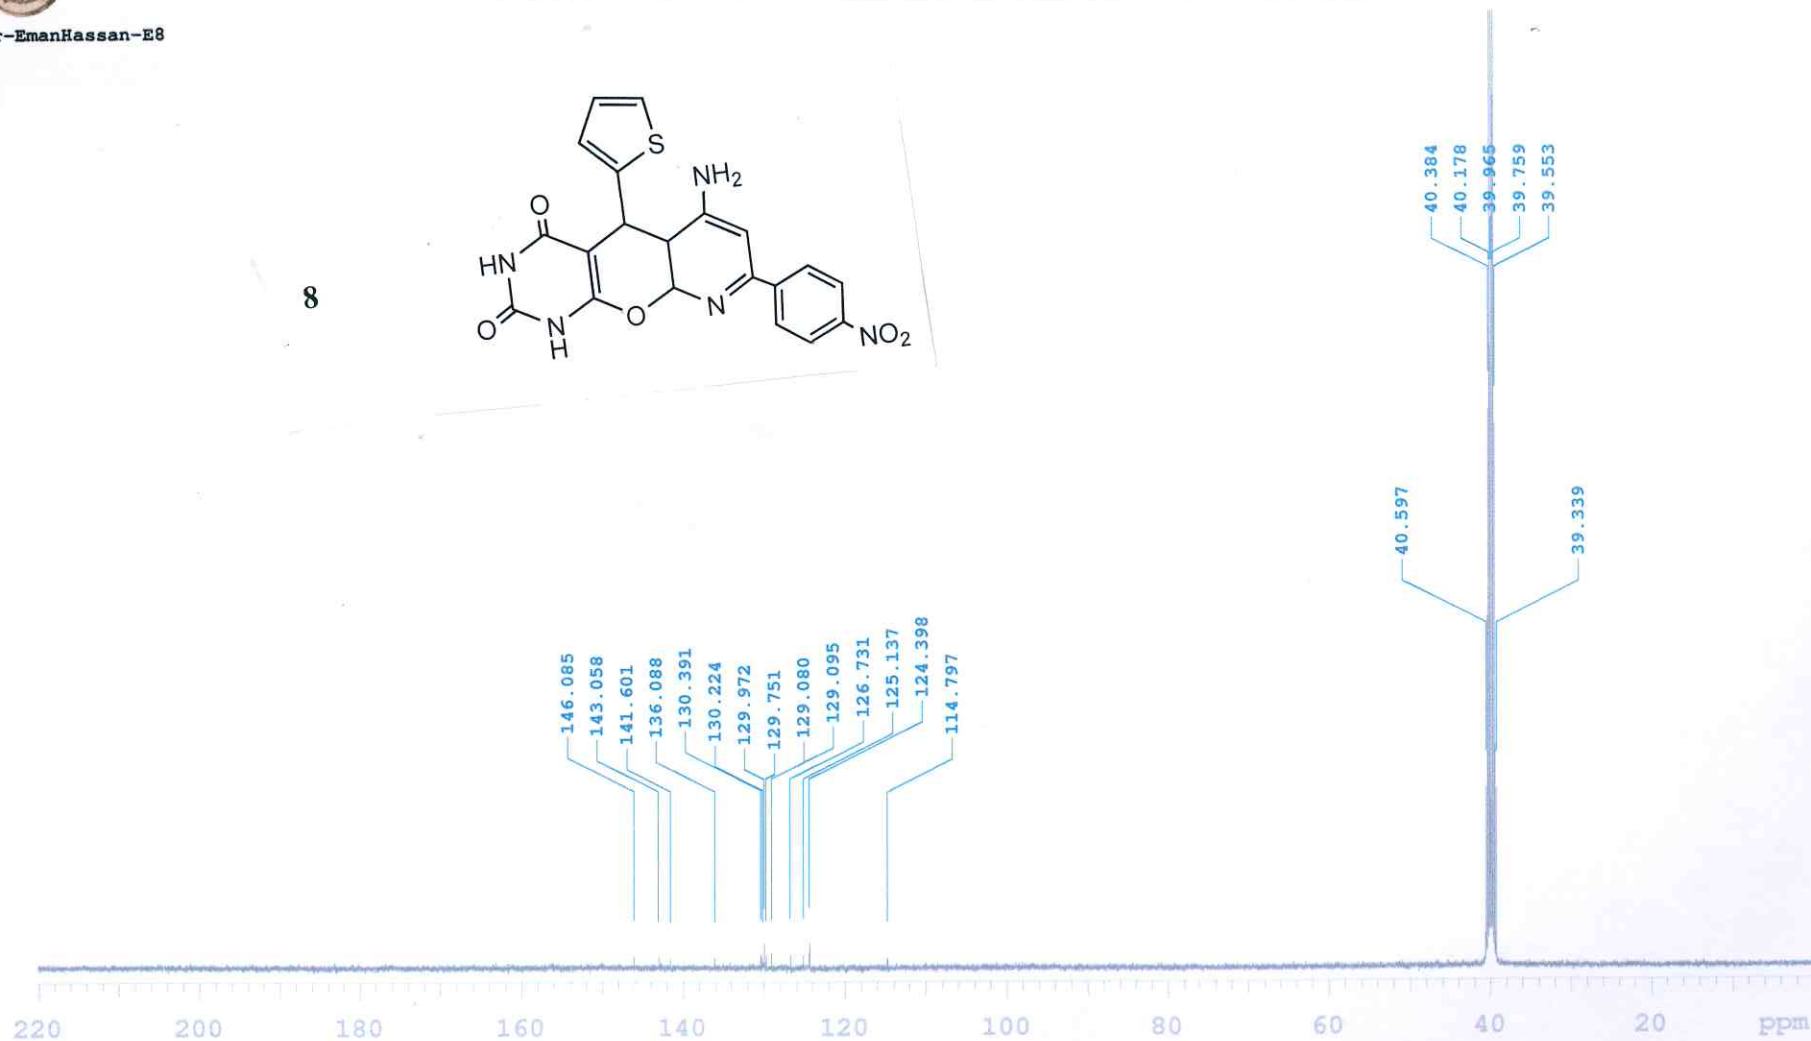

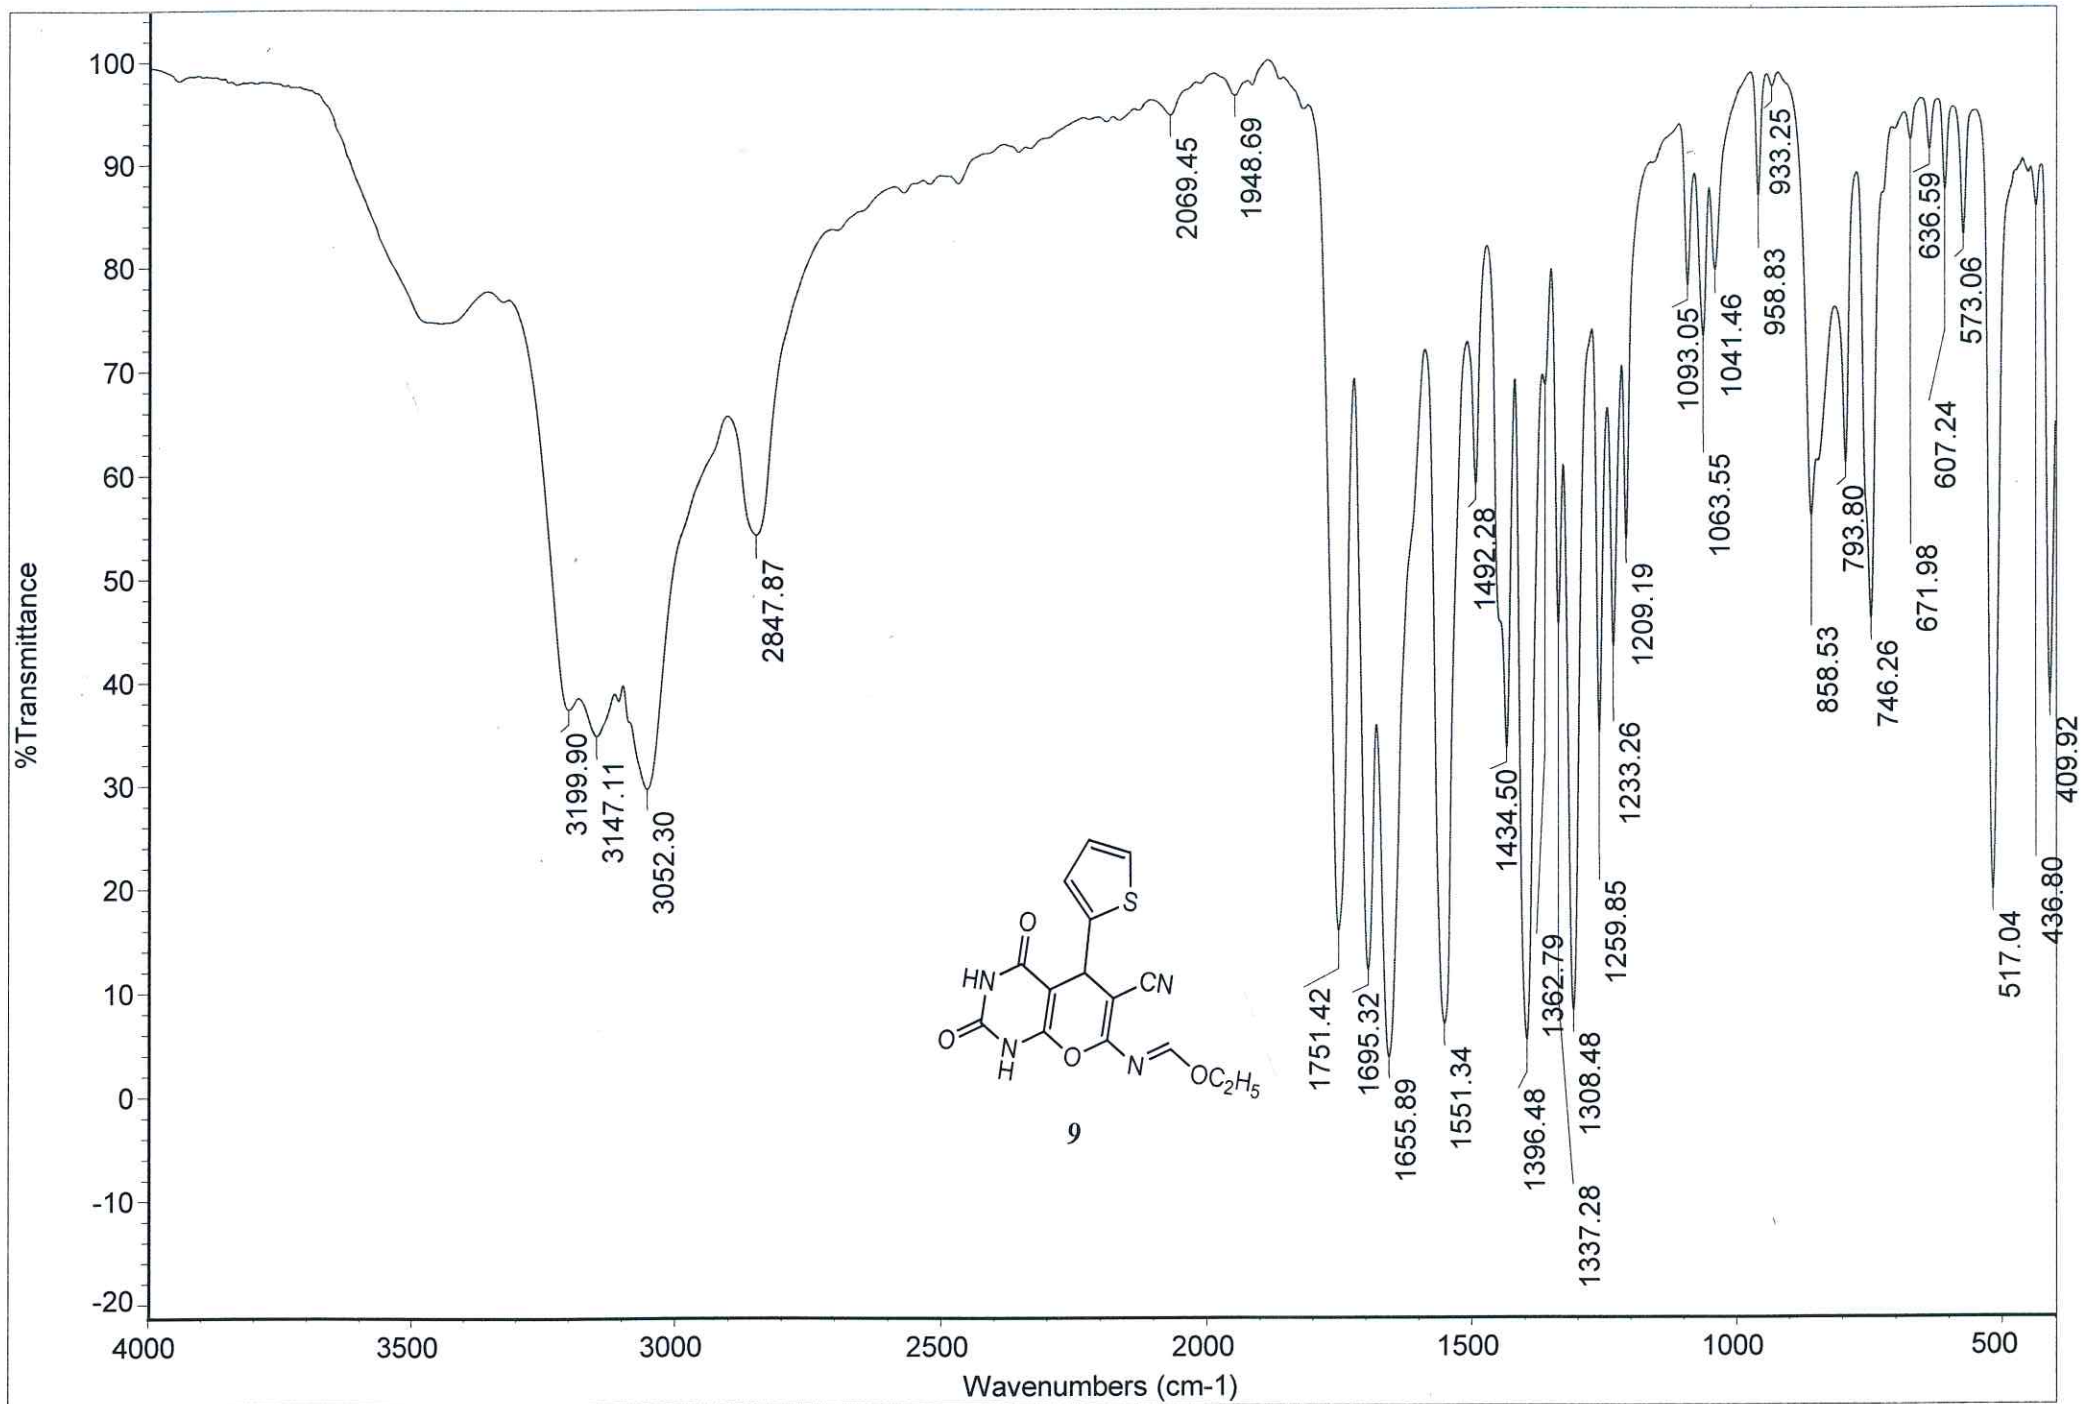

(6)



(6)

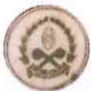

Dr-EmanHassan-E9

Sample Name **Dr-EmanHassan-E9**  
Date collected **2019-02-23**

Pulse sequence **PROTON**  
Solvent **DMSO**

Temperature **25**  
Spectrometer **nmr400-mercury400**

Laboratory **MODCL**  
NMR User

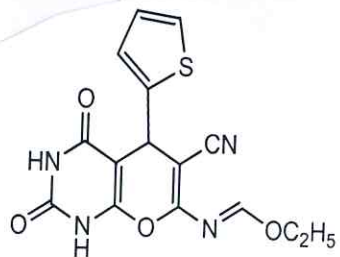

9

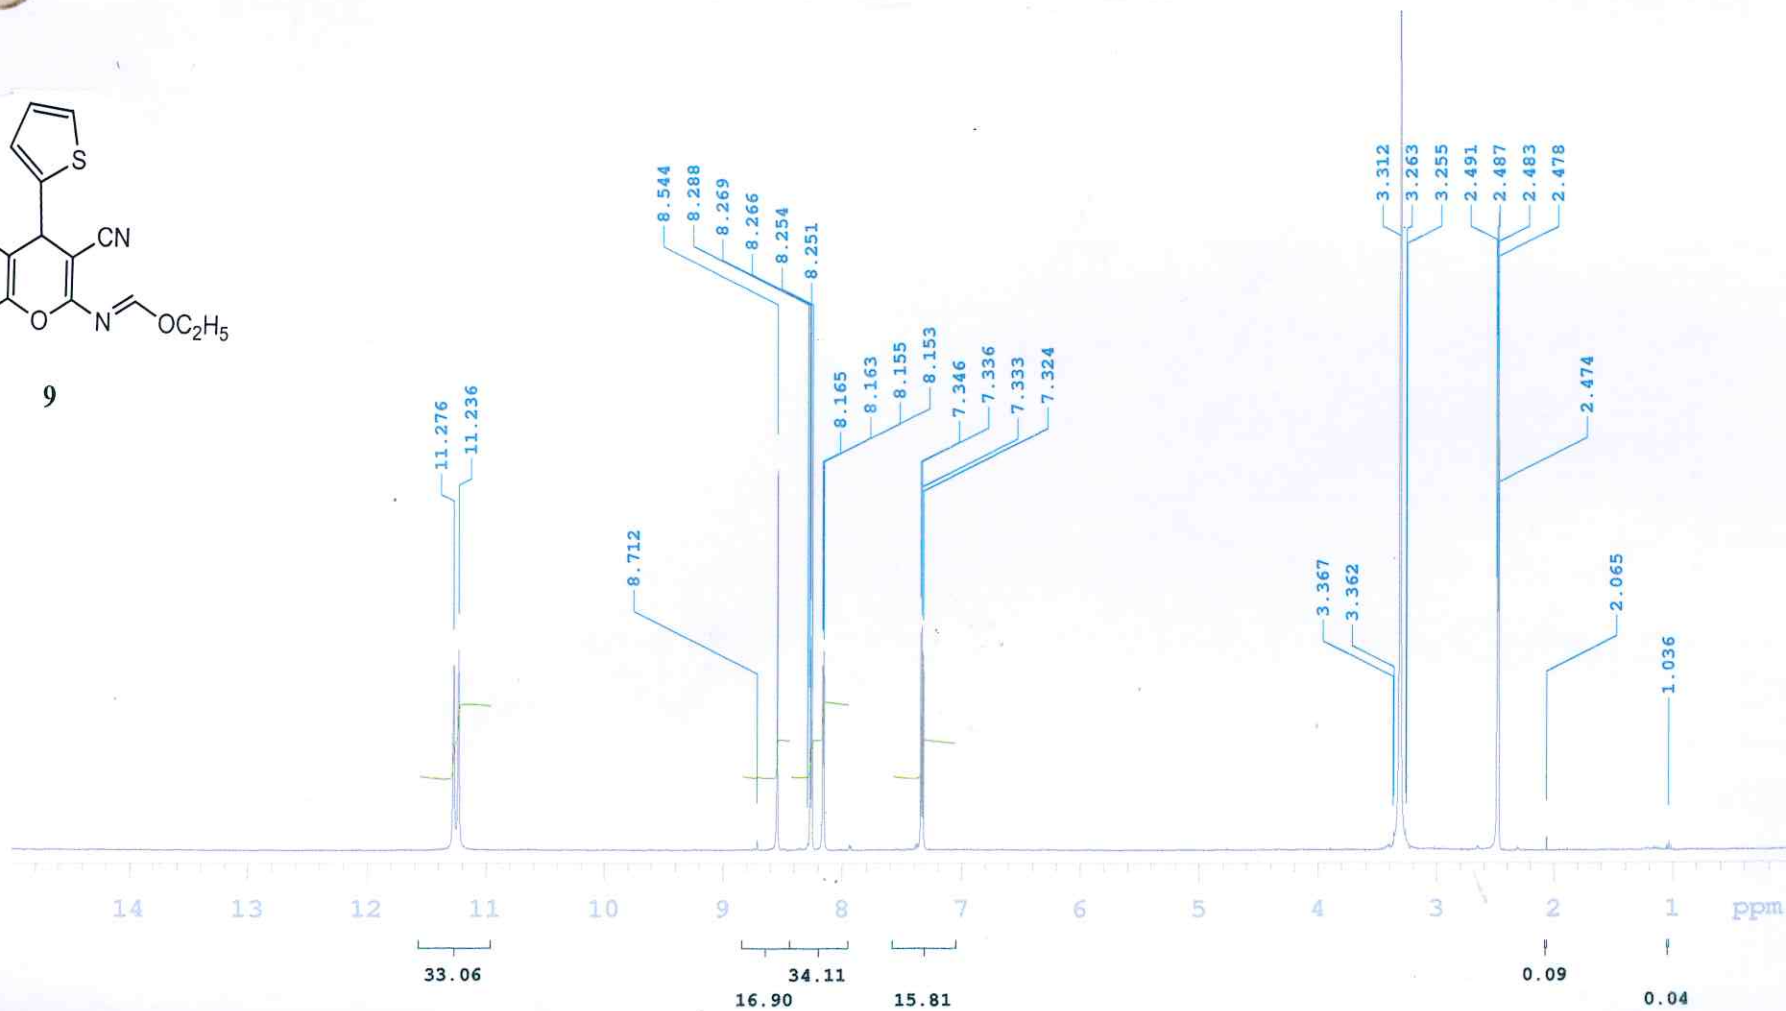

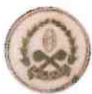

Dr-EmanHassan-E9

Sample Name **Dr-EmanHassan-E9**  
Date collected **2019-02-23**

Pulse sequence **CARBON**  
Solvent **DMSO**

Temperature **25**  
Spectrometer **nmr400-mercury400**

Laboratory **MODCL**  
NMR User

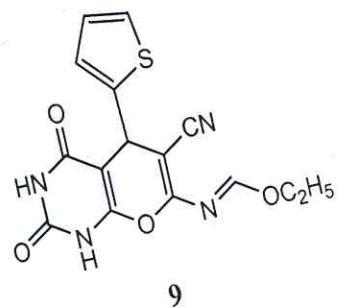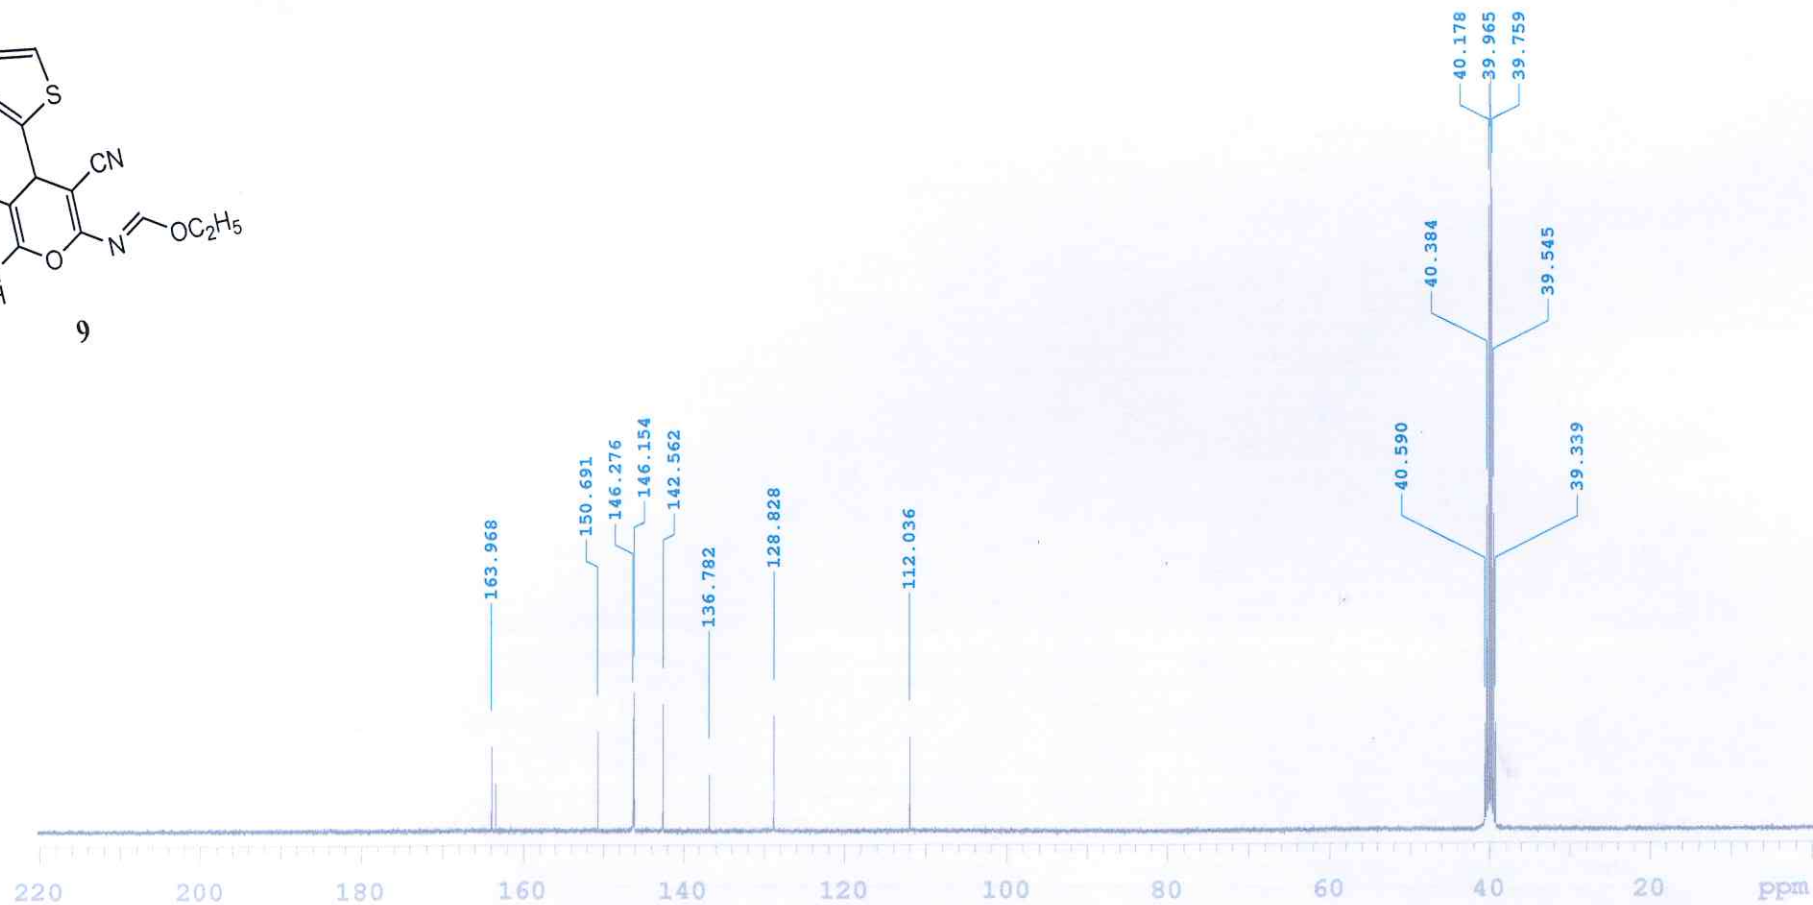

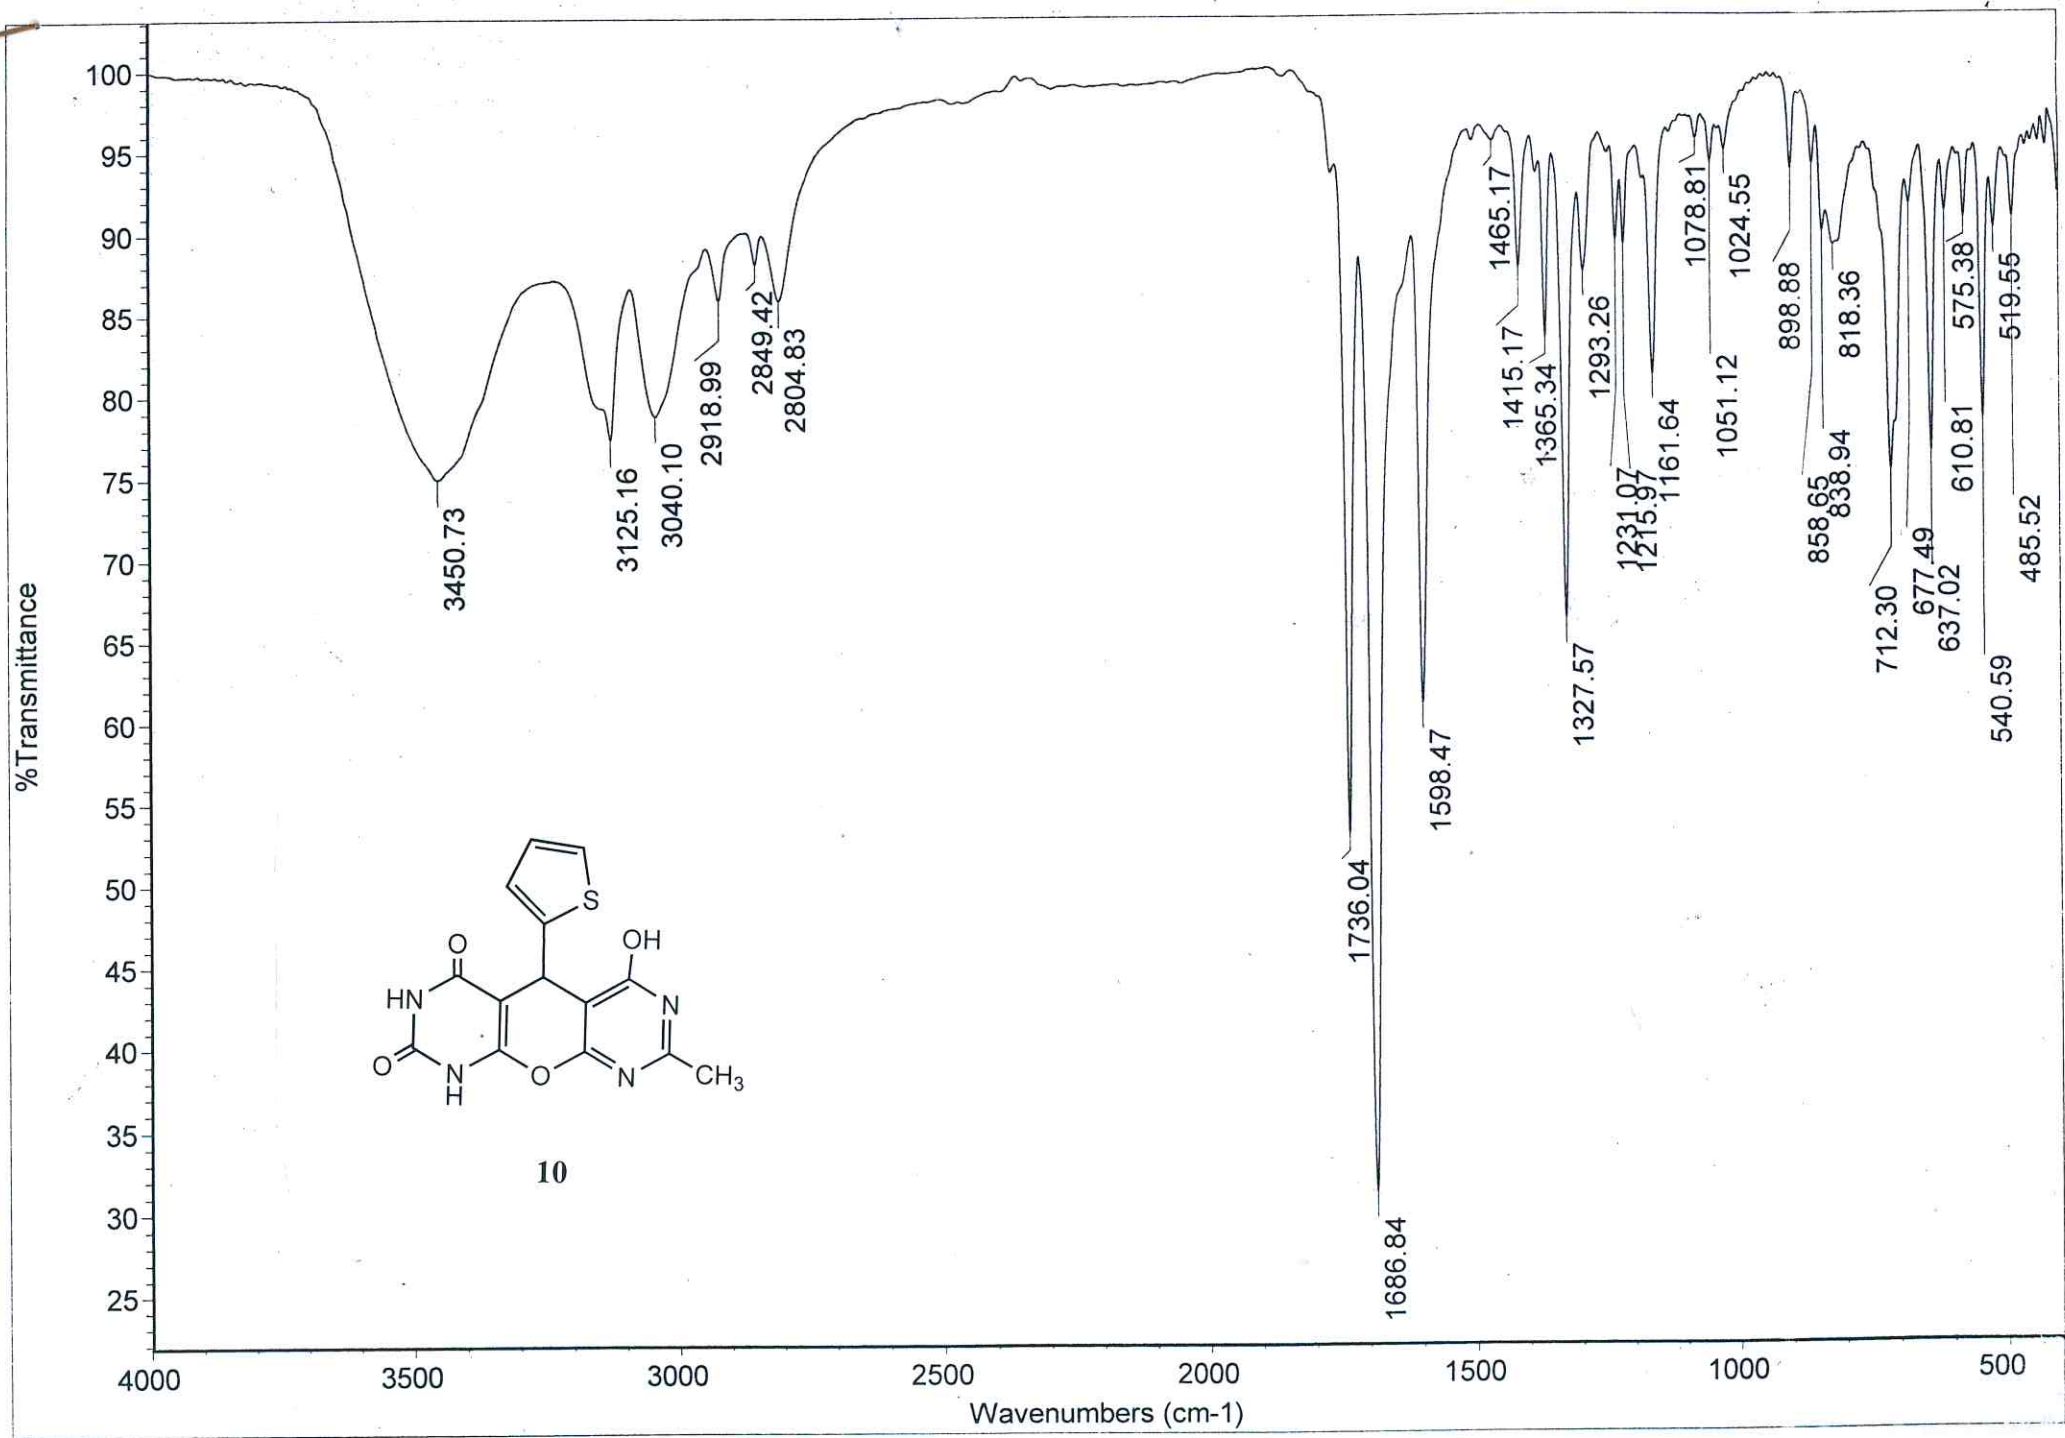

Dr\_EmanHassan-10

Sample Name **Dr\_EmanHassan-10**  
Date collected **2018-09-16**

Pulse sequence **PROTON**  
Solvent **DMSO**

Temperature **25**  
Spectrometer **nmr400-mercury400**

Laboratory **MODCL**  
NMR User **sameeh\_Albadawy**

Dr\_EmanHassan-10

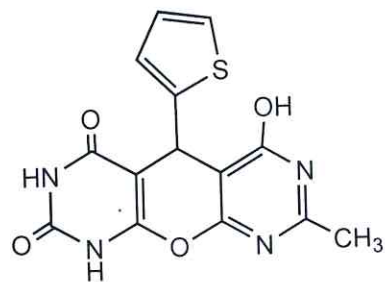

10

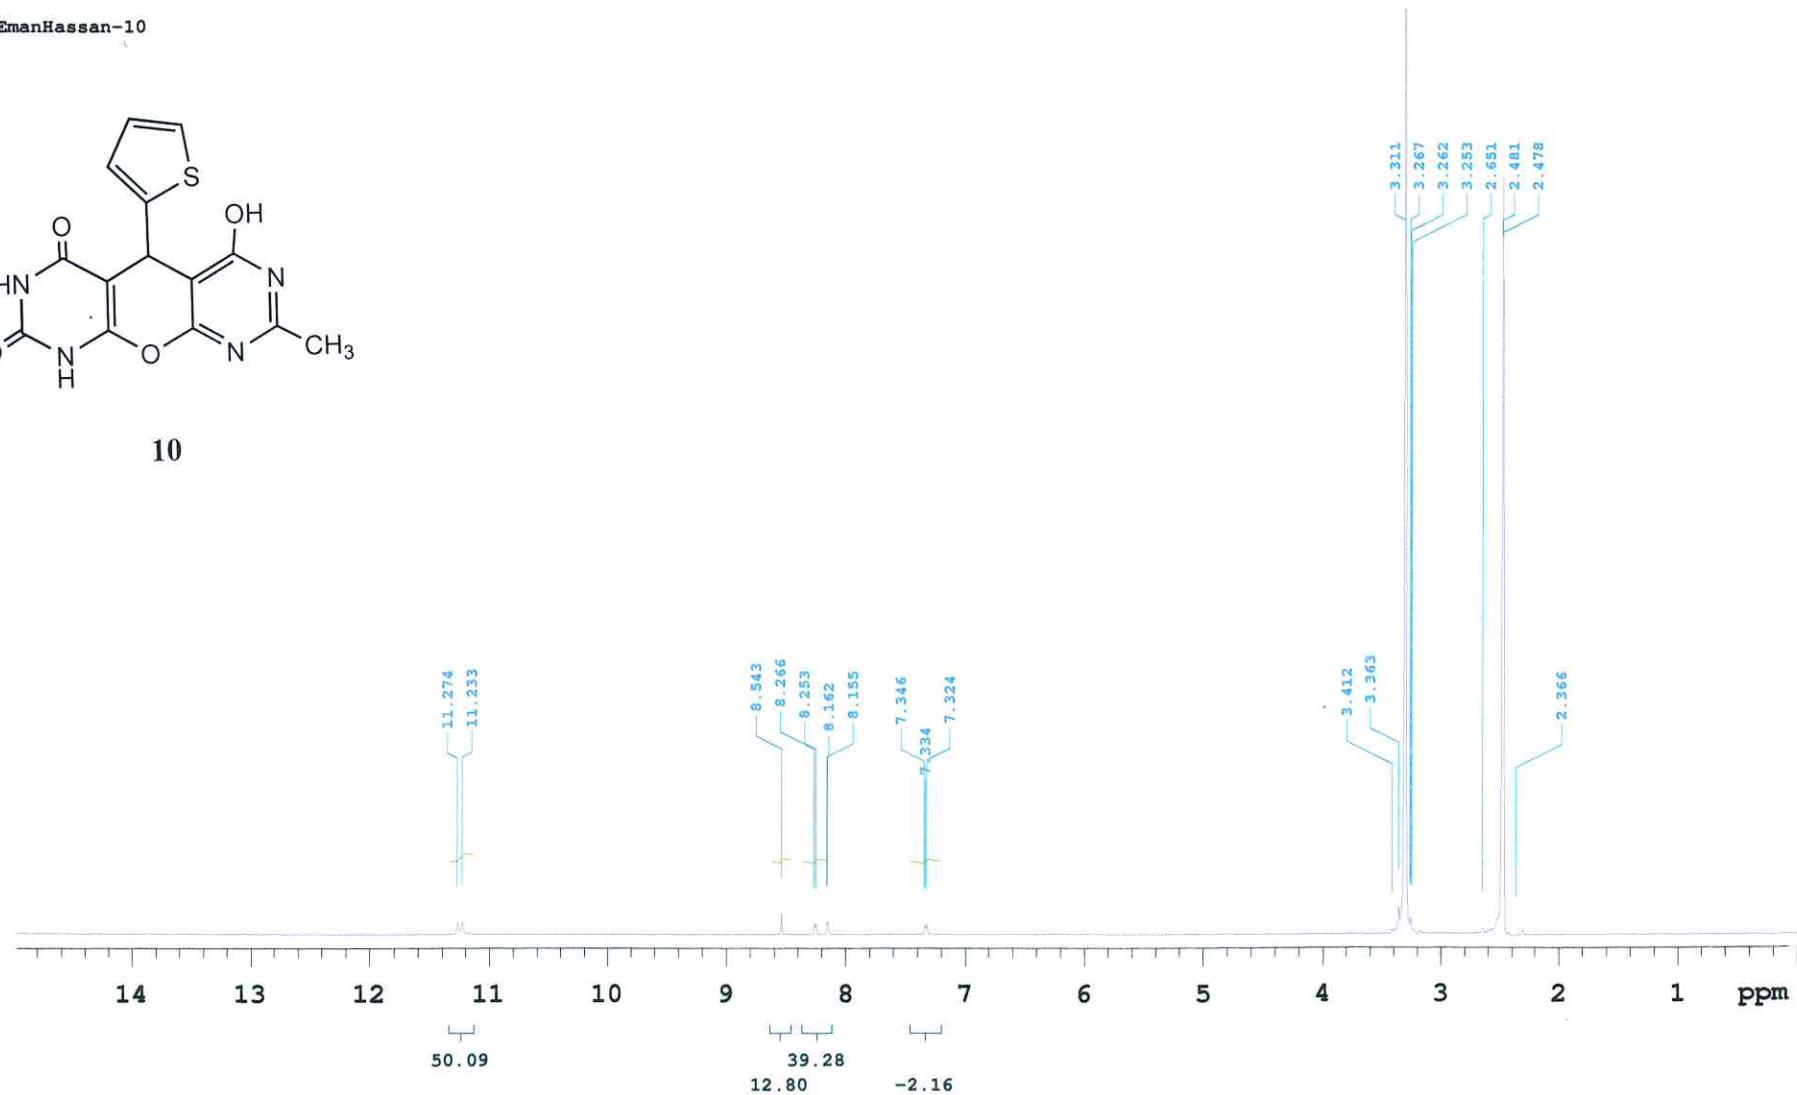

Plotname: Dr\_EmanHassan-10\_PROTON\_01\_plot02



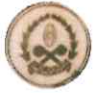

Dr-EmanHassan-E10

Sample Name **Dr-EmanHassan-E10**  
Date collected **2019-02-24**

Pulse sequence **CARBON**  
Solvent **DMSO**

Temperature **25**  
Spectrometer **nmr400-mercury400**

Laboratory **MODCL**  
NMR User

Dr-EmanHassan-E10

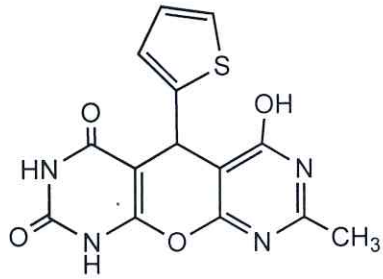

10

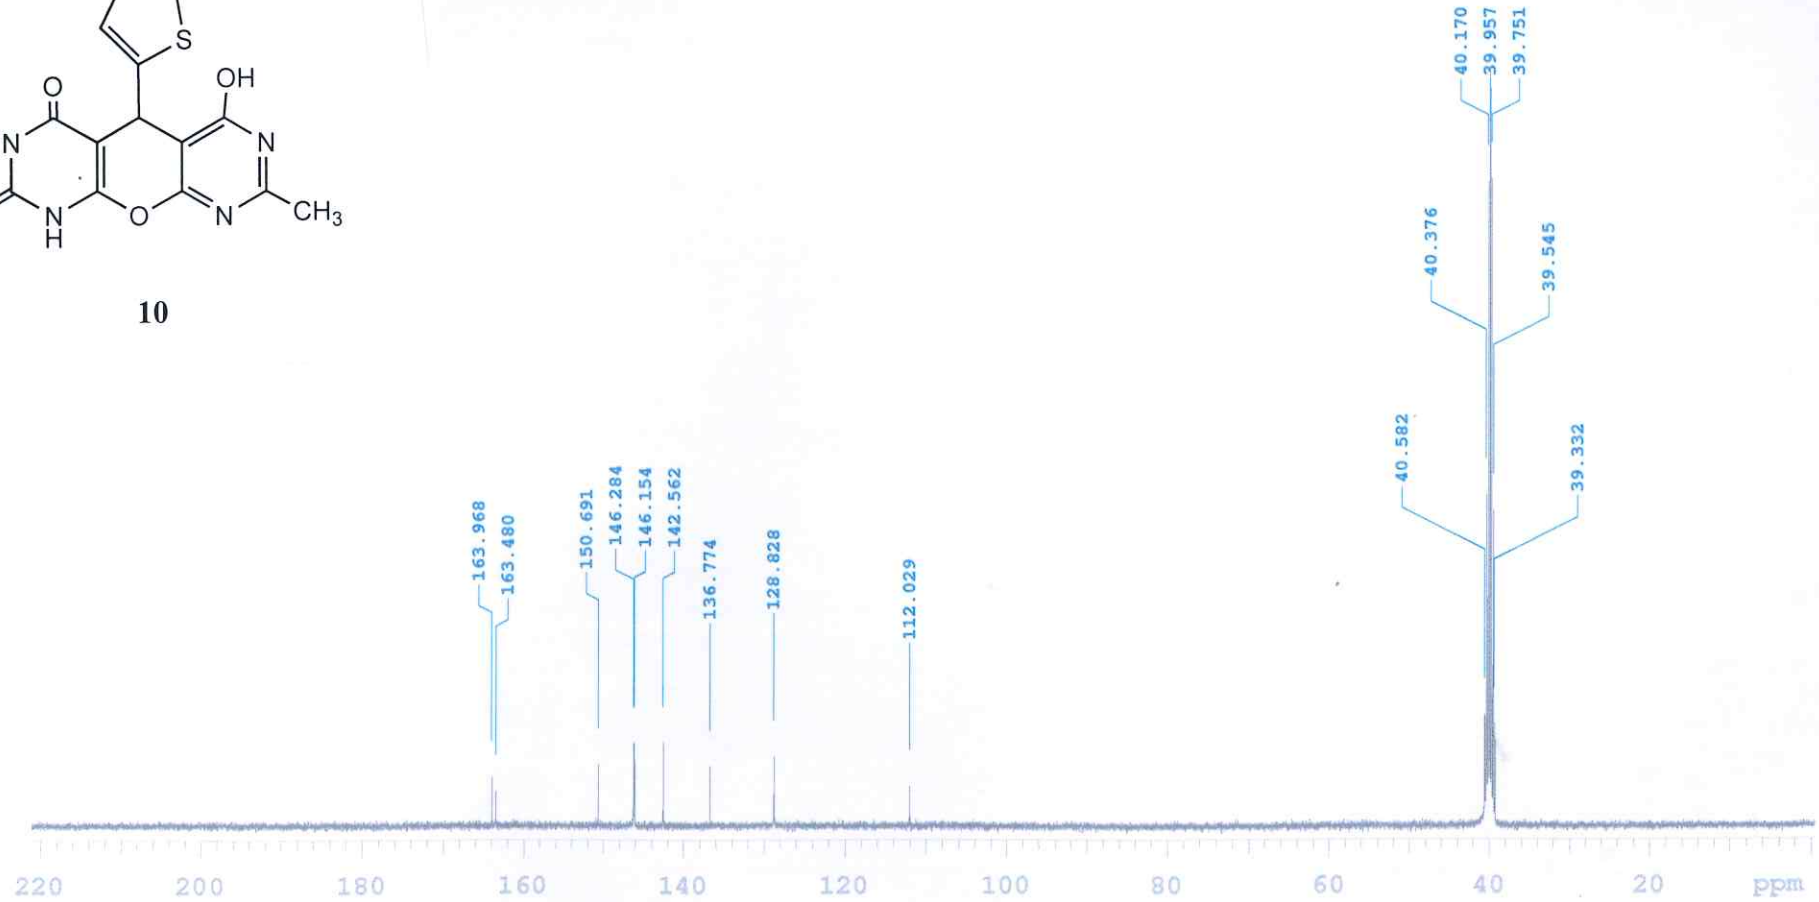

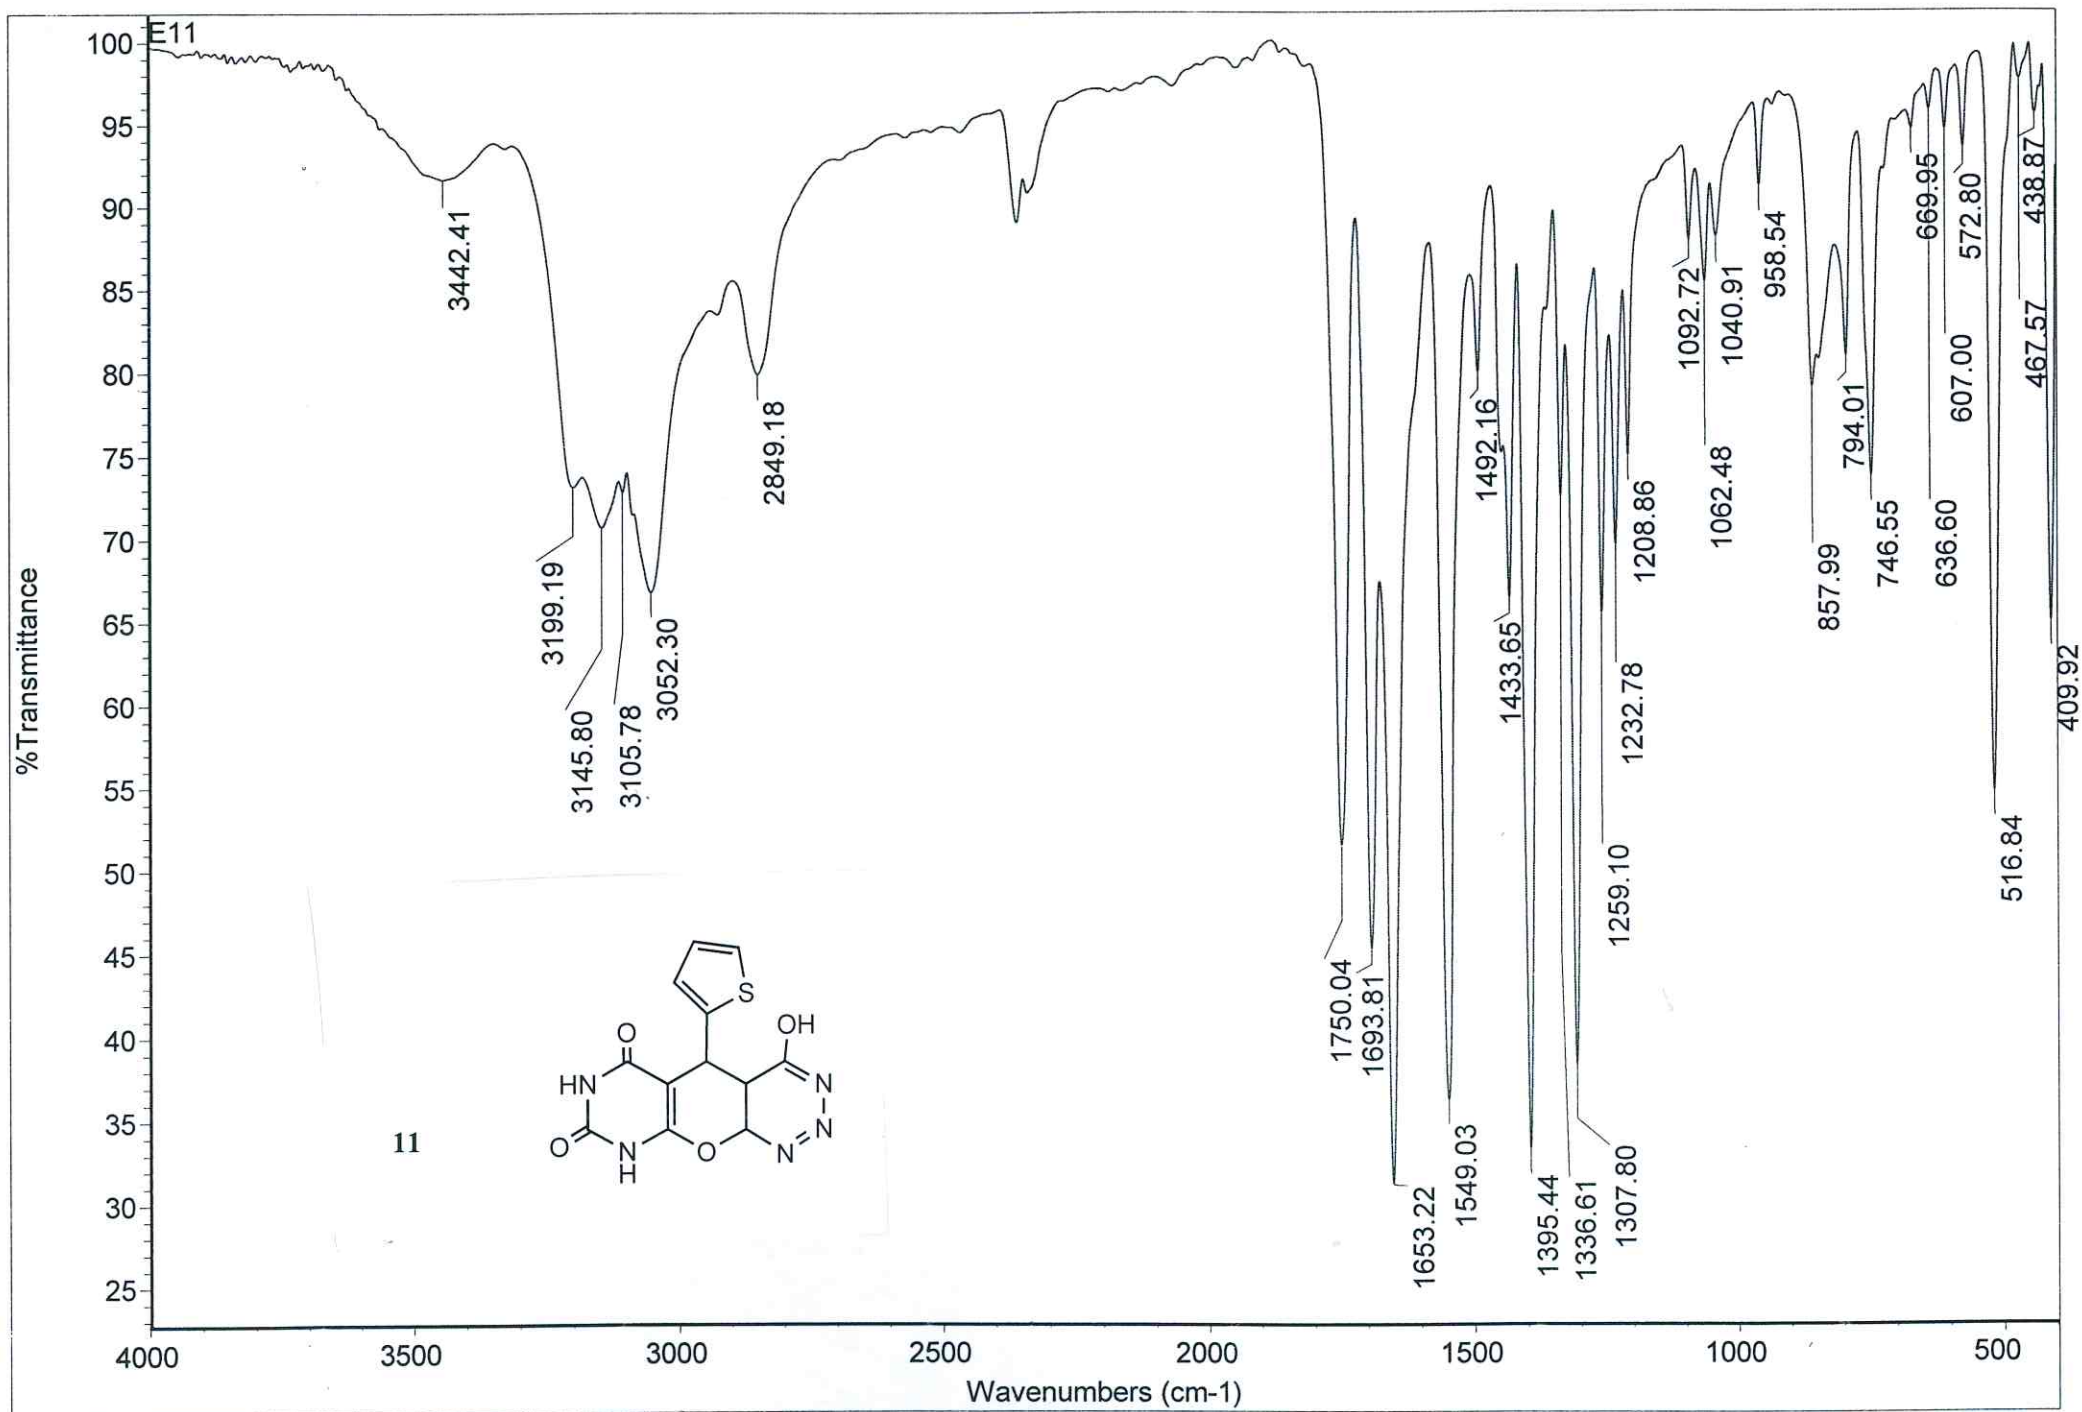

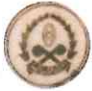

Dr-EmanHassan-E11

Dr-EmanHassan-E11

Sample Name **Dr-EmanHassan-E11**  
Date collected **2019-02-24**

Pulse sequence **PROTON**  
Solvent **DMSO**

Temperature **25**  
Spectrometer **nmr400-mercury400**

Laboratory **MODCL**  
NMR User

11

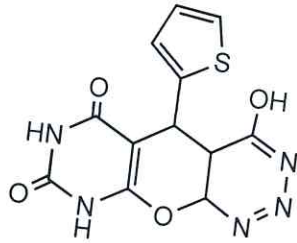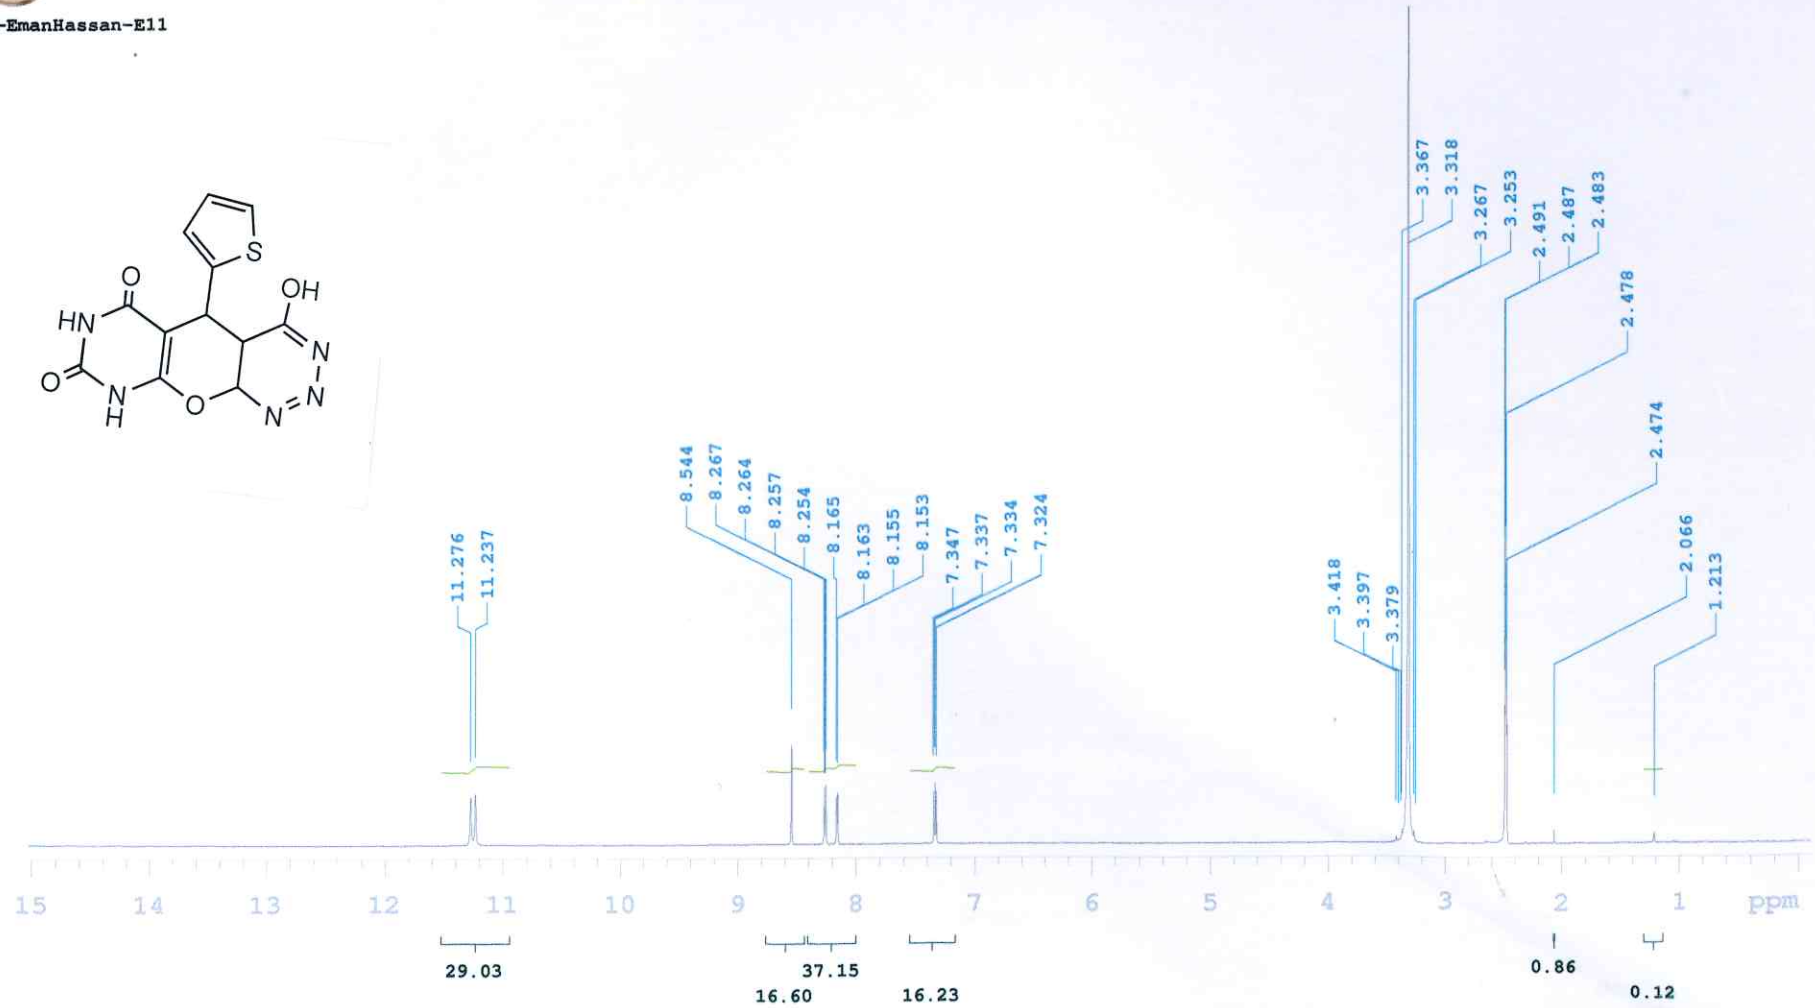

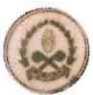

Dr-EmanHassan-E11

Dr-EmanHassan-E11

Sample Name **Dr-EmanHassan-E11**  
Date collected **2019-02-24**

Pulse sequence **CARBON**  
Solvent **DMSO**

Temperature **25**  
Spectrometer **nmr400-mercury400**

Laboratory **MODCL**  
NMR User

11

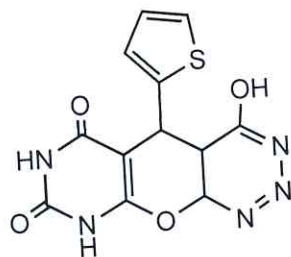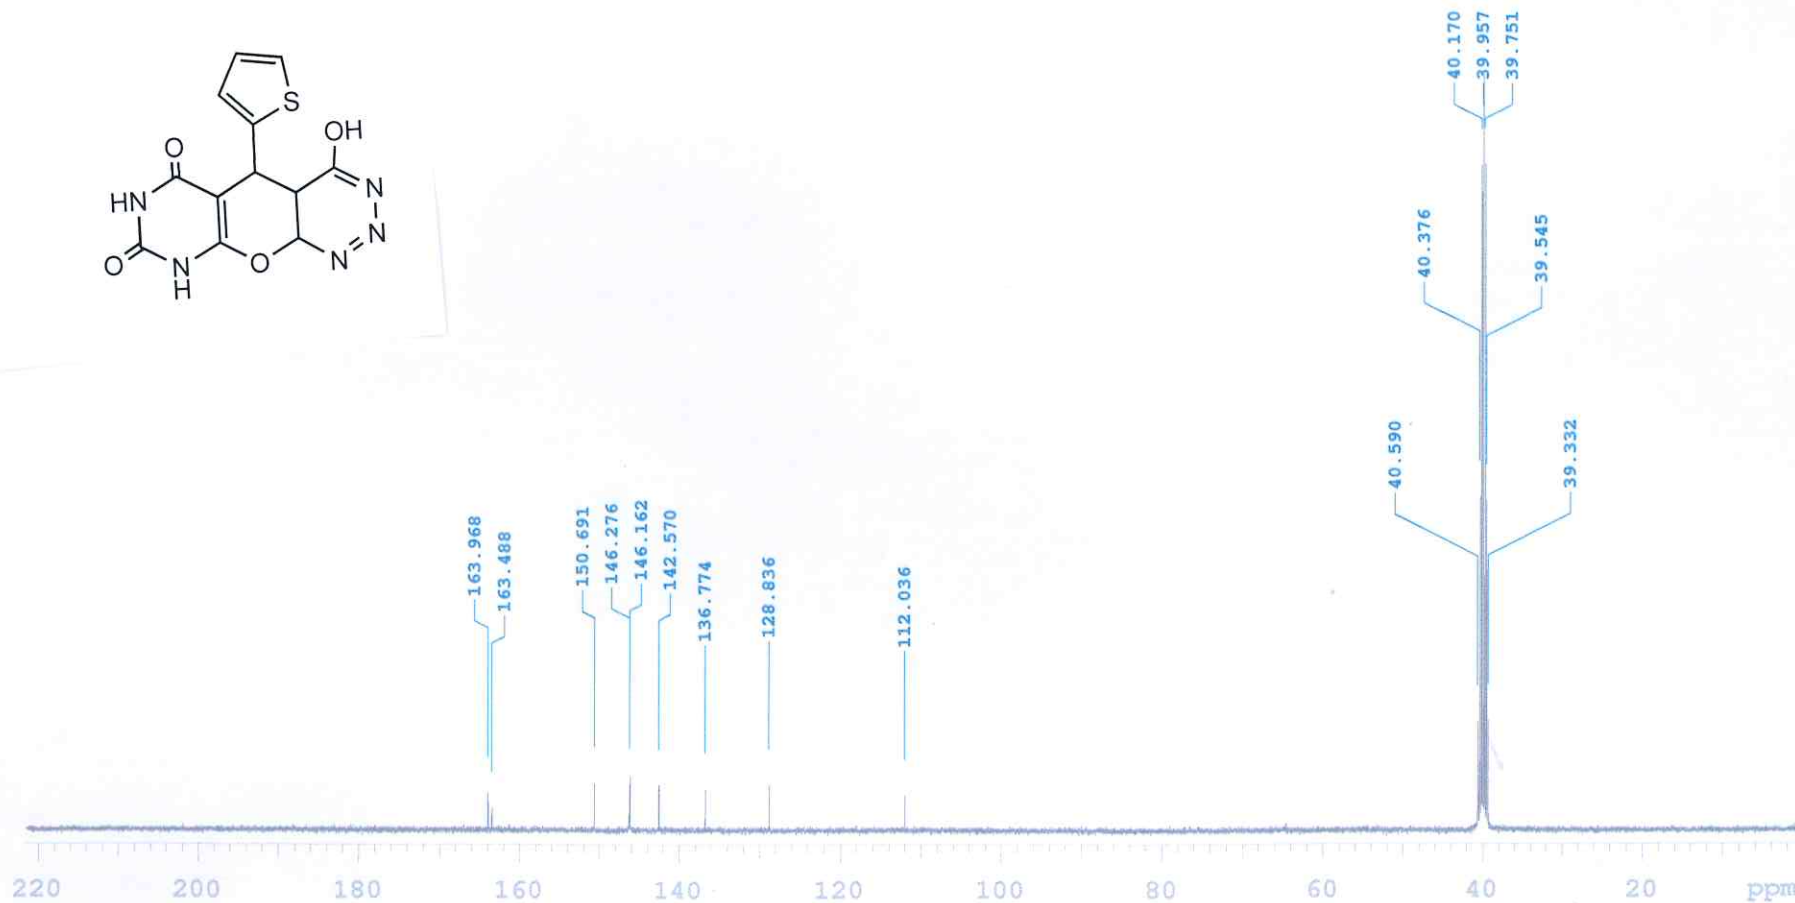

Supplement: d0ra10321g1.pdf [file d0ra10321g1.pdf]
